# Conformational Barrier of CheY3 and Inability of CheY4 to Bind FliM Control the Flagellar Motor Action in *Vibrio cholerae*

Maitree Biswas<sup>1</sup>, Sanjay Dey<sup>1</sup>, Susmita Khamrui<sup>2\*</sup>, Udayaditya Sen<sup>2</sup>, Jhimli Dasgupta<sup>1\*</sup>

<sup>1</sup> Department of Biotechnology, St. Xavier's College, Kolkata, India, <sup>2</sup> Crystallography and Molecular Biology Division, Saha Institute of Nuclear Physics, Kolkata, India

## Abstract

*Vibrio cholerae* contains multiple copies of chemotaxis response regulator (VcCheY1–VcCheY4) whose functions are elusive yet. Although previous studies suggested that only VcCheY3 directly switches the flagellar rotation, the involvement of VcCheY4 in chemotaxis could not be ruled out. None of these studies, however, focused on the structure, mechanism of activation or molecular basis of FliM binding of the VcCheYs. From the crystal structures of Ca<sup>2+</sup> and Mg<sup>2+</sup> bound VcCheY3 we proposed the presence of a conformational barrier composed of the hydrophobic packing of W61, M88 and V106 and a unique hydrogen bond between T90 and Q97 in VcCheY3. Lesser fluorescence quenching and higher  $K_m$  value of VcCheY3, compared to its mutants VcCheY3-Q97A and VcCheY3-Q97A/E100A supported our proposition. Furthermore, aforesaid biochemical data, in conjunction with the structure of VcCheY3-Q97A, indicated that the coupling of T90 and Q97 restricts the movement of T90 toward the active site reducing the stabilization of the bound phosphate and effectively promoting autodephosphorylation of VcCheY3. The structure of BeF<sub>3</sub><sup>−</sup> activated VcCheY3 insisted us to argue that elevated temperature and/or adequacy of phosphate pool might break the barrier of the free-state VcCheY3 and the conformational changes, required for FliM binding, occur upon phosphorylation. Structure of VcCheY4 has been solved in the free and sulfated states. VcCheY4<sup>sulf</sup>, containing a bound sulfate at the active site, appears to be more compact and stable with a longer  $\alpha$ 4 helix, shorter  $\beta$ 4 $\alpha$ 4 loop and hydrogen bond between T82 and the sulfate compared to VcCheY4<sup>free</sup>. While pull down assay of VcCheYs with VcFliM<sub>NM</sub> showed that only activated VcCheY3 can interact with VcFliM<sub>NM</sub> and VcCheY4 cannot, a knowledge based docking explained the molecular mechanism of the interactions between VcCheY3 and VcFliM and identified the limitations of VcCheY4 to interact with VcFliM even in its phosphorylated state.

**Citation:** Biswas M, Dey S, Khamrui S, Sen U, Dasgupta J (2013) Conformational Barrier of CheY3 and Inability of CheY4 to Bind FliM Control the Flagellar Motor Action in *Vibrio cholerae*. PLoS ONE 8(9): e73923. doi:10.1371/journal.pone.0073923

**Editor:** Andrea Motta, National Research Council of Italy, Italy

**Received:** March 21, 2013; **Accepted:** July 26, 2013; **Published:** September 16, 2013

**Copyright:** © 2013 Biswas et al. This is an open-access article distributed under the terms of the Creative Commons Attribution License, which permits unrestricted use, distribution, and reproduction in any medium, provided the original author and source are credited.

**Funding:** Partial funding from: CSIR/37(1381)/09/EMR-II, Govt. of India. No additional external funding were received for this study. The funders had no role in study design, data collection and analysis, decision to publish, or preparation of the manuscript.

**Competing Interests:** The authors have declared that no competing interests exist.

\* E-mail: jhimlidasgupta@yahoo.com

‡ Current address: Department of Biochemistry, University of Washington, Seattle, Washington, United States of America

## Introduction

*Vibrio cholerae*, the highly motile gram-negative bacterial pathogen that causes cholera, uses chemotaxis and motility to travel to its preferred intestinal niche to colonize [1]. Extensive studies on chemotaxis of *Escherichia coli* or *Salmonella typhimurium* showed that the ligand induced conformational change in methyl accepting chemotaxis protein (MCP) is sensed by the CheA–CheW complex eventually resulting autophosphorylation of the kinase CheA. Autophosphorylated CheA then donates phosphate to the response regulator CheY. Phosphorylated CheY interacts with the flagellar motor protein FliM and influence the direction of flagellar rotation from counter clock wise (CCW) to clock wise (CW) [2,3]. CCW rotation results smooth swimming and CW rotation causes the cell to tumble [4]. Because of the presence of a single polar flagellum, *V. cholerae* does not tumble as such but reverses direction briefly, allowing the bacterium to randomly reorient itself and swim in a new direction.

The genomes of a large number of bacterial species, including *Vibrio cholerae*, *Pseudomonas aeruginosa*, *Rhodobacter spaeroides*, *Myxococcus xanthus*, *Borrelia burgdorferi*, and *Yersinia pestis*, encode for multiple

paralogues of the various chemotaxis genes and chemotaxis in these bacteria is more complex [5,6]. A recent genomic and bioinformatic analysis of over 450 bacteria indicates that more than 50% of the chemotaxis gene homologs have more than one copy of chemotaxis genes [5] and these genes are involved not only in flagellum-mediated chemotaxis but also in type-4 pilus-based motility [7,8], polysaccharide biosynthesis associated with pilus-based gliding motility [9] and flagellar morphogenesis [10]. In many cases, however, genetic analysis has not been successful in deciphering the function of these chemotaxis gene homologs [5,11].

The genome sequence of *V. cholerae* has three sets of Che protein and 45 MCP-like proteins [12]. Each set of *che* genes forms clusters where *che* cluster I (located on chromosome I) contains *cheY1*, *cheA1*, *cheY2*, *cheR1*, *cheB1* and the putative gene *cheW*; cluster II of chromosome I contains *cheW1*, *cheB2*, *cheA2*, *cheZ* and *cheY3*, while cluster III of chromosome II contains *cheB3*, *cheD*, *cheR3*, *cheW2*, *cheW3*, *cheA3* and *cheY4*.

So far, the molecular characterization of all four CheYs of *V. cholerae* (namely, VcCheY1–VcCheY4) is restricted to a few *in vivo*

studies where some of the chemotaxis related genes are found to be involved in the virulence of *V. Cholerae* [13–15] [3]. Attempts to identify the *V. cholerae cheY* responsible for the flagellar motion showed that a deletion of *cheY3* impairs chemotaxis [1] while insertional disruption and duplication of the *cheY4* gene result in decreased and increased motility respectively [13]. Swarming assay and assessment of the swimming behaviour indicated that only *VcCheY3* directly switches flagellar rotation, although this study could not rule out the involvement of *VcCheY4* in the motor action [14]. Later, Bandyopadhaya and Chaudhuri (2009) showed that inactivation of *cheY3* or *cheY4* generates a less motile and less adherent mutant [15]. Sequence analysis of *VcCheYs* indicate that only 17% residues are identical among them which comprise the residues involved in binding of the divalent metal ion and stabilization of the phosphorylated intermediate (Figure 1a). This implies that the basic machinery for the phosphorylation is intact for all four *VcCheYs*. Available literature, however, suggest that deletion of the *cheY1* and *cheY2* genes does not cause any defect in chemotaxis [14] and motility or adherence remains unaffected for the insertional mutants of *cheY1* or *cheY2* [15]. All these observations point to the fact that *VcCheY3* and *VcCheY4* are the key response regulators to control chemotaxis in *V. cholerae*.

Structures of CheY from different bacterial sources suggest that although all of these response regulators possess an overall  $(\beta/\alpha)_5$  fold, small differences in the amino acid sequence or point mutations lead to the subtle conformational variations that make each of these proteins unique in terms of their function [16–18]. Also, T87I and T87I/Y106W mutants of *EcCheY* were found to be phosphorylatable although these mutants were unable to generate clockwise rotation of the flagella [19]. In addition, both of these mutants had ~5-fold lower autodephosphorylation rates and the mutants were completely resistant to CheZ activity, indicating that an isoleucyl side-chain at position 87 renders *EcCheY* unable to perform its chemotactic functions [20].

*VcCheY3* bears only 37% sequence identity with that of *VcCheY4* (Figure 1a) and so far, nothing is known about the structure, mechanism of activation or molecular basis of FliM binding for these two key response regulators, implicated in chemotaxis and virulence of *V. cholerae*. Here we report, the structures of *VcCheY3* in  $\text{Ca}^{2+}$  and  $\text{Mg}^{2+}$  bound states,  $\text{BeF}_3^-$  activated *VcCheY3* (*VcCheY3-BeF}\_3^-*) and of the mutant *VcCheY3-Q97A*. Our structural observations identified a unique conformational barrier in *VcCheY3* that controls its phosphorylation event. Implication of this barrier is established by fluorescence spectroscopic study on *VcCheY3* and its mutants *VcCheY3-Q97A*, *VcCheY3-Q97A/E100A* and *VcCheY3-D60A*, comparison of their  $K_m$  values and pull down assay with *VcFliM<sub>NM</sub>*. We have also reported the structures of *VcCheY4* in free and sulfate bound states here and comparison of these structures helped us to argue that *VcCheY4* has a strong tendency to be phosphorylated and the phosphorylated state would be more stable compared to its free state. While our pull down assay showed that only activated *VcCheY3* can interact with *VcFliM<sub>NM</sub>* and *VcCheY4* cannot, structure based docking explained the molecular mechanism of the interactions between *VcCheY3* and *VcFliM* and identified the structural limitations of *VcCheY4* to interact with *VcFliM* even in its phosphorylated state.

## Materials and Methods

### Cloning, Overexpression and Purification

*VcCheY3* and *VcCheY4* were purified according to the previously described protocols [21,22]. Briefly, the genes encoding

*VcCheY3* and *VcCheY4* were amplified from *V. cholerae* O395 genomic DNA and cloned into pET28a<sup>+</sup> vector. After transformation, cells were grown at 37°C until the optical density at 600 nm ( $\text{OD}_{600}$ ) reached 0.4 to 0.6. Protein expression was induced by the addition of IPTG (isopropyl-D-thiogalactopyranoside) to a final concentration of 0.1 mM. The cells were harvested by centrifugation and the resuspended pellet was lysed by sonication in presence of PMSF. The cell lysate was then centrifuged (12000 g for 50 mins) at 4°C. The 6×His tagged protein was isolated from the supernatant using  $\text{Ni}^{2+}$ -NTA affinity chromatography (Qjagen) and were eluted with lysis buffer containing 150 mM imidazole. The eluted fractions were checked by 15% SDS-PAGE, pooled and dialyzed overnight against the thrombin cleavage buffer (0.05 M Tris-HCl pH 8.0, 150 mM NaCl) and the 6×His tag was cleaved with 1 U thrombin by overnight incubation at 4°C. The proteins were further purified by gel filtration chromatography using a Sephacryl S-100 (GE-Healthcare) column (78×1.4 cm) pre-equilibrated with thrombin cleavage buffer containing 0.02% sodium azide at 4°C.

The gene encoding FliM<sub>NM</sub> (residue 1–250) was amplified from *V. cholerae* O395 genomic DNA and cloned into pET21b<sup>+</sup> vector with a C-terminal 6×His-tag to get optimal expression level and solubility. The FliM<sub>NM</sub> protein was purified by growing cells in LB media to an optimal density 0.6–0.8 at 600 nm and induced with 1 mM IPTG. The cells were harvested after induction at 37°C for 3 h. Cell pellet was resuspended in lysis buffer containing 50 mM Tris-HCl pH 7.5, 250 mM NaCl, 1 mM PMSF and 10 mg lysozyme and lysed by sonication. After centrifugation (14000×g, for 45 mins and at 4°C) FliM<sub>NM</sub> with C-terminal 6×His-tag was isolated from the supernatant by using  $\text{Ni}^{2+}$ -NTA agarose (Qjagen) and the protein was eluted with lysis buffer containing 200 mM Imidazole. After checking in 12% SDS-PAGE the eluted fractions were dialyzed against the lysis buffer.

### Mutagenesis

*VcCheY3-D60A*, *VcCheY3-Q97A* and *VcCheY3-Q97A/E100A* were prepared by two-step PCR and verified by commercial sequencing. All the mutant proteins were purified using the same protocol described for the wild type protein.

### FliM<sub>NM</sub>-CheY Interaction through Nickel Pull-down Assay

50  $\mu\text{l}$  of  $\text{Ni}^{2+}$ -NTA slurry (Qjagen) was washed three times with binding buffer containing 10 mM imidazole, 150 mM NaCl, 5 mM  $\text{MgCl}_2$ , 0.15% Tween 20 and 50 mM Tris-Cl (pH 7.5) and the resin was then incubated with 0.1 ml purified FliM<sub>NM</sub>-His protein in a concentration of 0.2 mg/ml at 25°C for 20 mins with gentle shaking. The beads were then washed for three times with the binding buffer before adding *VcCheY3*, *VcCheY3-Q97A*, *VcCheY3-Q97A/E100A*, *VcCheY3-D60A* or *VcCheY4*. For activation, respective protein was pre-incubated for 20 mins with  $\text{BeF}_3^-$  (100 mM). The mixture was then added in the FliM<sub>NM</sub>-His bound  $\text{Ni}^{2+}$ -NTA resin maintaining 1:1 molar ratio and incubated for another 10 mins at 25°C. The beads were washed three times with the buffer and then resuspended in 25  $\mu\text{l}$  of 4×SDS-PAGE gel loading buffer and were subjected to SDS-PAGE analysis and Coomassie blue staining.

### Fluorescence Spectroscopy

Fluorescence measurement was carried out using a spectrofluorometer, Hitachi F-7000. Fluorescence was measured at an excitation wavelength of 295 nm and an emission wavelength of 340 nm with slit widths of 2.5 nm and 5 nm for excitation and emission, respectively. All reactions were carried out at 25°C. Equilibrium titrations of *VcCheY3*, *VcCheY3-Q97A/E100A*,



## Crystallization and Data Collection

Crystallization data of *VcCheY3* [21] and *VcCheY4* [22] have been published earlier. Briefly, crystals of *VcCheY3* that grew in low-salt condition using 5% (w/v) PEG 6000 in 0.1 M Tris–HCl pH 8.0 as precipitant, belong to space group R3 and diffracted to a resolution of 1.67 Å. Crystals of *VcCheY3* were also grown in the presence of  $Mg^{2+}$  in a similar condition which diffracted up to 2.2 Å. *VcCheY4* crystals grew in AMS at two different pH conditions. In the high-pH condition, hexagonal-shaped crystals were obtained using 0.8 M ammonium sulfate, 0.1 M Bicine pH 9.0, 4% glycerol as precipitant. In the low-pH condition, cube-shaped crystals were obtained using 0.8 M ammonium sulfate, 0.1 M citrate, 4% glycerol as precipitant. The low-pH and high-pH condition crystals were diffracted upto 1.67 Å and 1.9 Å with the space group *C2* and *P3<sub>2</sub>21* respectively.

Crystals of *VcCheY3-Q97A* mutant grew in a drop consisting of 2 µl protein (6 mg/ml) solution and an equal volume of precipitant containing 1.6 M ammonium sulfate, 0.1 M Tris, pH 8.0. Cube-shaped crystals of *VcCheY3-Q97A* belonging to space group R3 diffracted to a resolution of 2.4 Å.

Activated *VcCheY3* were prepared by mixing 20 µl of protein (6 mg/ml) solution with 5 µM of  $BeF_3^-$  solution and incubated for 5 minutes on ice. Crystals of activated *VcCheY3* were grown in a drop contains 2 µl of above mixture and equal volume of precipitant solution consisting of 10% (w/v) PEG 6000 in 0.1 M Tris–HCl pH 8.0 and equilibrated for 7 day against 20% (w/v) PEG 6000 in 0.1 M Tris–HCl pH 8.0. Activated *VcCheY3* crystals, after brief soaking in cryoprotectant solution containing 1 µM of  $BeF_3^-$ , diffracted upto 2.1 Å with the space group R3.

For data collection, crystals were fished out from the crystallization drops using nylon loop, briefly soaked in cryoprotectant solution and flash-cooled in a stream of nitrogen (Oxford Cryosystems) at 100 K. The diffraction data sets were collected using a MAR Research image-plate detector of diameter 345 mm and Cu  $K_{\alpha}$  radiation generated by a Bruker–Nonius FR591 rotating-anode generator equipped with Osmic Max Flux confocal optics and operated at 50 kV and 70 mA. Data were processed and scaled using AUTOMAR (<http://www.marresearch.com/automar/run.html>). Data-collection and processing statistics are given in Table 1.

## Structure Determination and Refinement

The structures of wild type *VcCheY3*, *VcCheY4*, *VcCheY3-Q97A* and activated *VcCheY3* (*VcCheY3-BeF<sub>3</sub><sup>-</sup>*) were solved by molecular replacement using MOLREP of CCP4 suite [25]. Packing considerations indicated the presence of one molecule in the asymmetric unit for all the structures.

The wild type *VcCheY3* structure in its  $Ca^{2+}$  bound form was solved by using the coordinates of the *Salmonella* CheY (PDBID: 2 CHE) as template. The structure was refined by alternating cycles of model building and refinement using 'O' and CNS [26,27] to a final  $R_{cryst}$  and  $R_{free}$  values of 20.2% and 22.9% respectively. The poly-ala model of *VcCheY3* was used as search model for *VcCheY4* (low pH) and the refined structure of *VcCheY4* (low pH) was used as search model to determine the structure high pH CheY4 (*VcCheY4<sup>free</sup>*). Low pH *VcCheY4* (*VcCheY4<sup>sulf</sup>*) was refined to  $R_{cryst}$  21.8% and  $R_{free}$  24.6% and *VcCheY4<sup>free</sup>* was refined to  $R_{cryst}$  22.5% and  $R_{free}$  26.0%. *VcCheY3-BeF<sub>3</sub><sup>-</sup>* structure was solved by using the coordinates of *E. coli* activated CheY i.e. *EcCheY-BeF<sub>3</sub><sup>-</sup>* (PDB code: 1F4V) as the search model. Strong electron density of beryllofluoride was found close to the active-site residue D60. The structure was refined upto  $R_{cryst}$  of 23.1% and  $R_{free}$  of 24.3% by several rounds of refinements and manual rebuilding by using the programs CNS [27] and COOT [28],

respectively. The structure of *VcCheY3-Q97A* was solved using *VcCheY3* as template and refined by the similar protocol to  $R_{cryst}$  of 22.5% and  $R_{free}$  of 25.2%. The structure of  $Mg^{2+}$  bound *VcCheY3* was also solved using *VcCheY3* ( $Ca^{2+}$  bound) as template after removing the coordinates of  $Ca^{2+}$  and waters and refined by the similar protocol to  $R_{cryst}$  of 20.0% and  $R_{free}$  of 22.5%. Details of the refinement parameters for all the structures along with the geometric parameters determined by PROCHECK [29] are given in Table 2.

## Calculation of Normalized B Factor

Since *VcCheY4<sup>free</sup>* and *VcCheY4<sup>sulf</sup>* crystals grew in different space groups and their diffraction resolutions are different, to compare their B factors we have plotted their normalized B-factor or B'-factor. Crystallographic B-factors of proteins determined even at high resolutions show large variations from one structure to another but the B-factors expressed in units of standard deviation about their mean value (normalized B-factor or B'-factor) shows consistent behaviour [30–32]. The equation used by us to calculate the normalized B-factor is  $B' = B - \langle B \rangle / \sigma \langle B \rangle$ ; where  $\langle B \rangle$  is the average B value for the whole molecule based on C $\alpha$  atoms and  $\sigma \langle B \rangle$  is the standard deviation of the B values.

## Results

### Overall Structures of *VcCheY3* and *VcCheY4*

As expected, both *VcCheY3* and *VcCheY4* possess  $(\beta/\alpha)_5$  fold (Figure 1 b, c) typical of the response regulators. Structure of *VcCheY3* in free state superposes on *S. typhimurium* CheY (*S/CheY*; PDB code: 2 CHE) with a root mean square deviation (rmsd) of 0.4 Å (for 108 Ca atoms) (Figure 1b). *VcCheY4* was crystallized in two different states; one is in free state with no ligand attached (*VcCheY4<sup>free</sup>*) and another with a sulfate and a  $Ca^{2+}$  ion bound at the active site (*VcCheY4<sup>sulf</sup>*). Interestingly, when *VcCheY4<sup>free</sup>* is superposed on *VcCheY4<sup>sulf</sup>* significant differences are observed at the active site, together with helix  $\alpha_4$ ,  $\beta_4\alpha_4$  loop and  $\beta_3\alpha_3$  loop (Figure 1c). Since *VcCheY4<sup>free</sup>* and *VcCheY4<sup>sulf</sup>* were crystallized in different space groups, we have checked the probable influence of the crystal packing on the observed structural differences. Our packing analysis suggests that, in either case, these regions are rather loosely packed and their conformations are not influenced by crystal packing. *VcCheY4*, in either state, is significantly different from that of *VcCheY3* (Figure 1b) and superposition of *VcCheY4<sup>free</sup>* and *VcCheY4<sup>sulf</sup>* on *VcCheY3* produces rmsd values of 1.4 Å and 1.2 Å respectively. *VcCheY4*, in either state, differs from *VcCheY3* mainly in the  $\alpha_1$ ,  $\alpha_5$ ,  $\alpha_4$  regions and in the  $\beta_3\alpha_3$  loop (Figure 1b). It is to be noted that  $\alpha_1$  and  $\alpha_5$  were implicated previously in CheA and FlhM binding respectively [33].

We have solved the structures of *VcCheY3* in  $Ca^{2+}$  and  $Mg^{2+}$  bound states to the resolutions of 1.67 Å (Figure S1a) and 2.2 Å (Figure S1b) respectively. The location of the  $Ca^{2+}$  (or  $Mg^{2+}$ ) ion in *VcCheY3* is similar to that of  $Mg^{2+}$  ion in *S/CheY*. The  $Ca^{2+}$  (or  $Mg^{2+}$ ) of *VcCheY3* is heptacoordinated where four coordinations occur with protein atoms and three with water molecules (Figure 2a). In contrast to that, the  $Mg^{2+}$  of *S/CheY* is hexacoordinated. Although D12 of *S/CheY* is not coordinated to  $Mg^{2+}$ , D15 of *VcCheY3* that corresponds to D12 of *S/CheY*, coordinates with the metal ion (Figure 2a). Except this residue the disposition of the side chains of the other residues that coordinate with the metal ion are more or less similar in these structures (Figure 2a). The average coordination distance between  $Ca^{2+}$  and the protein atoms is about 2.4 Å while this is of about 2.1 Å in case of  $Mg^{2+}$  which is due to the size difference of the ions.



**Table 1.** Data collection and processing statistics.

| Space group                                                             | VcCheY3 Mg <sup>2+</sup> bound | VcCheY3-Q97A               | VcCheY3-BeF <sub>3</sub> <sup>-</sup> |
|-------------------------------------------------------------------------|--------------------------------|----------------------------|---------------------------------------|
|                                                                         | R3                             | R3                         | R3                                    |
| Unit-cell parameters (Å )                                               | a = b = 67.48, c = 74.46       | a = b = 65.858, c = 65.039 | a = b = 67.320, c = 72.660            |
| Oscillation range (°)                                                   | 0.5                            | 0.5                        | 0.5                                   |
| Number of images                                                        | 92                             | 138                        | 88                                    |
| Maximum resolution (Å )                                                 | 30.0–2.2                       | 30.0–2.8                   | 30.0–2.1                              |
| No. of molecules per ASU                                                | 1                              | 1                          | 1                                     |
| Mathews coefficient (V <sub>M</sub> , Å <sup>3</sup> Da <sup>-1</sup> ) | 2.23                           | 1.86                       | 2.19                                  |
| Solvent content (%)                                                     | 44.9                           | 33.77                      | 43.86                                 |
| No. of observations                                                     | 16597                          | 9361                       | 10428                                 |
| No. of unique reflections                                               | 6341                           | 4141                       | 7391                                  |
| Mosaicity (°)                                                           | 1.59                           | 0.5                        | 0.35                                  |
| Completeness (%)                                                        | 98.9(100)                      | 97.9(98.8)                 | 94.3(92.2)                            |
| R <sub>merge</sub> <sup>†</sup> (%)                                     | 8.45(44.3)                     | 7.39 (27.80)               | 3.12(22.47)                           |
| Average I/σ(I)                                                          | 7.5(2.7)                       | 5.3(2.0)                   | 6.5(2.0)                              |

doi:10.1371/journal.pone.0073923.t001

### Identification of a Conformational Barrier Towards Activation of VcCheY3

In *S*/CheY or *E*cCheY, upon phosphorylation at D57, a series of structural changes occur near the active site. T87 along with β4α4 loop moves toward the active site and stabilizes the bound phosphate through hydrogen bonding. Y106 of β5 executes an ‘inward’ movement (shown in line in Figure 2b) with minimal conformational adjustments of W58 and M85 and that inward movement of Y106 is essential for the binding of FliM at α4-β5-α5 face of CheY. K109 and the Mg<sup>2+</sup> contribute to stabilize phosphorylated D57 [34]. In the free state *S*/CheY, W58 stays more on the surface (with χ<sub>1</sub> of 174°, χ<sub>2</sub> of -101°) and M85 side chain adopts such a χ<sub>1</sub> value (-155°) that together these residues

leave a preformed cavity for the ‘inward’ positioning of Y106 upon activation (Figure 2b).

D60 is the site of phosphorylation in VcCheY3 as it corresponds to D57 of *S*/CheY (Figure 1a). Both in the Mg<sup>2+</sup> and Ca<sup>2+</sup> bound free state structures of VcCheY3, the side chain of W61 (that corresponds to W58 of *S*/CheY) is observed in a conformation, substantially different from that of *S*/CheY (Figure 2c, 2d). In the free state structure of VcCheY3, the side chain of W61 buries unusually deeply with a χ<sub>1</sub> of -135° and χ<sub>2</sub> of -133° (Figure 2c). Y109 stays in its ‘out’ position and the side chain of M88 (with χ<sub>1</sub> of 64°, χ<sub>2</sub> of 175°) stays between W61 and Y109, packing snugly with W61, Y109 and V106 through hydrophobic interactions (Figure 2c). This

**Table 2.** Refinement statistics.

|                                          | VcCheY3 Ca <sup>2+</sup> bound | VcCheY3 Mg <sup>2+</sup> bound | VcCheY3-Q97A | VcCheY3-BeF <sub>3</sub> <sup>-</sup> | VcCheY4 <sup>sulf</sup> | VcCheY4 <sup>free</sup> |
|------------------------------------------|--------------------------------|--------------------------------|--------------|---------------------------------------|-------------------------|-------------------------|
| R <sub>cryst</sub> (%) <sup>a</sup>      | 20.2                           | 20.0                           | 22.5         | 23.1                                  | 21.8                    | 22.5                    |
| R <sub>free</sub> (%) <sup>b</sup>       | 22.9                           | 22.5                           | 25.2         | 24.3                                  | 24.6                    | 26.0                    |
| r.m.s.d bond (Å)                         | 0.005                          | 0.016                          | 0.019        | 0.012                                 | 0.006                   | 0.009                   |
| r.m.s.d angle (°)                        | 1.3                            | 1.6                            | 2.17         | 1.6                                   | 1.3                     | 1.59                    |
| No. of waters                            | 176                            | 94                             | 93           | 107                                   | 114                     | 144                     |
| B-factors (Å <sup>2</sup> )              | 19.05                          | 25.69                          | 48.194       | 27.350                                | 19.215                  | 46.52                   |
| <b>Ramachandran plot (%)<sup>f</sup></b> |                                |                                |              |                                       |                         |                         |
| Most favored(%)                          | 97.5                           | 95.1                           | 97.5         | 92.7                                  | 98.3                    | 94.9                    |
| Allowed(%)                               | 2.5                            | 4.8                            | 2.5          | 5.7                                   | 1.7                     | 34.2                    |
| Disallowed(%)                            | 0.0                            | 0.0                            | 0.0          | 1.6                                   | 0.0                     | 0.9                     |
| PDB code                                 | 3TO5                           | 4LX8                           | 4HNQ         | 4HNS                                  | 4H60                    | 4HNR                    |

<sup>†</sup>R<sub>merge</sub> =  $\sum_i \sum_j |I_{ij} - \langle I_{ij} \rangle| / \sum_i \sum_j I_{ij}$ , where  $I_{ij}$  is the intensity of an individual reflection and  $\langle I_{ij} \rangle$  is the average intensity over symmetry equivalents.

<sup>a</sup>R<sub>cryst</sub> =  $\sum_i |F_{obs} - F_{calcd}| / \sum_i F_{obs}$ , where  $F_{obs}$  and  $F_{calcd}$  are the observed and calculated structure factor amplitudes, respectively.

<sup>b</sup>R<sub>free</sub> is the equivalent of R-factor, calculated for a randomly chosen set of the reflections (5%) that were omitted throughout the refinement process. V<sub>M</sub> is the partial specific volume.

<sup>c</sup>As defined by PROCHECK.

doi:10.1371/journal.pone.0073923.t002

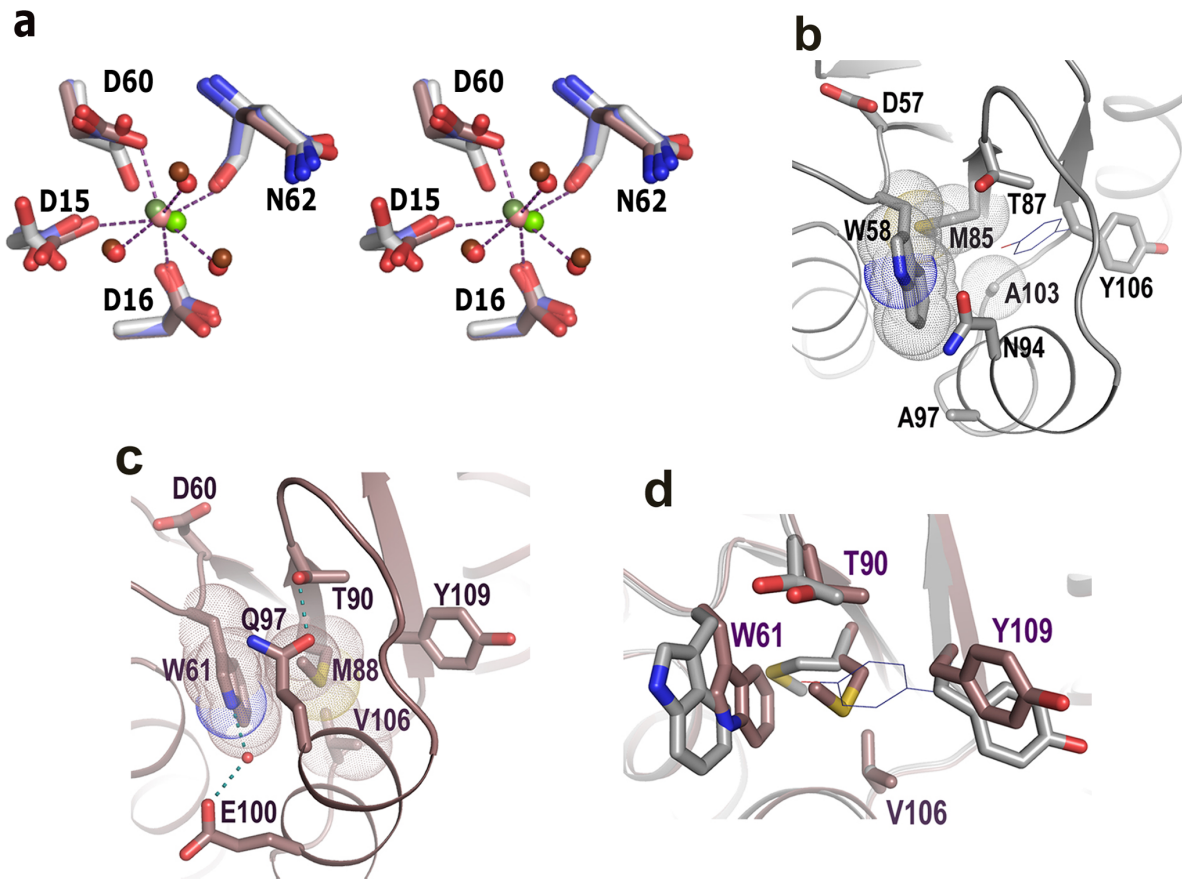

**Figure 2. Metal binding and conformational barrier in *VcCheY3*.** (a) Stereo representation to compare the  $\text{Ca}^{2+}$  and  $\text{Mg}^{2+}$  binding at the active site of *VcCheY3* (violet) with the  $\text{Mg}^{2+}$  binding of *StCheY3* (grey).  $\text{Ca}^{2+}$  bound to *VcCheY3* is shown as pink sphere,  $\text{Mg}^{2+}$  bound to *VcCheY3* is shown as dark green sphere and  $\text{Mg}^{2+}$  bound to *StCheY3* is shown as light green sphere. Waters bound to of  $\text{Ca}^{2+}$  and  $\text{Mg}^{2+}$  are shown as light and dark red spheres respectively. Only the hydrogen bonds, observed in  $\text{Ca}^{2+}$  bound *VcCheY3* are shown for clarity; (b) preformed pocket for the 'in' position for Y106 in *EcCheY* (thin line), coordinates for the 'in' position of Y106 is taken from the activated *EcCheY* structure (PDB code:1F4V), (c) The hydrophobic packing of W61, M88, V106, hydrogen bond between T90 and Q97, and water mediated hydrogen bond between E100 and W61 that make a conformational barrier in *VcCheY3*, (d) superposition of 'b' and 'c' showing the buried conformation of W61 and its packing with M88 in *VcCheY3* (violet) compared to *StCheY* (grey), 'in' position of Y109 (thin line) makes clashes with *VcCheY3* residues, doi:10.1371/journal.pone.0073923.g002

packing essentially fills up the pocket, required for the 'inward' positioning of Y109 upon activation (Figure 2c, 2d).

Moreover, in this inactivated structure of *VcCheY3*, the crucial T90 of  $\beta 4\alpha 4$  loop (that corresponds to T87 of *StCheY*), which stabilizes the bound phosphate on D60 upon activation, is hydrogen bonded with Q97 (Figure 2c). To the best of our knowledge, this kind of interaction involving the Thr of  $\beta 4\alpha 4$  loop was not observed so far in any other response regulator. In *VcCheY3*, T90 and Q97 are oriented in such a fashion that together they form a capping on the aforesaid hydrophobic packing and at the same time block the 'out to in' trajectory of Y109 (Figure 2d). Additionally, the side chain carboxylate group of E100 (which is Ala in *EcCheY* or *StCheY*) forms a water mediated hydrogen bond with NE1 of W61 (Figure 2c; Figure S3a, S3b). Therefore, the hydrophobic packing of W61 with M88 and V106, together with the hydrogen bond between T90 and Q97 and the water mediated interaction between W61 and E100 seem to make a conformational barrier that may affect the process of activation in *VcCheY3*.

### Comparison of Phosphorylation Events Through Fluorescence Spectroscopy

To investigate the contribution of the proposed 'conformational barrier' of *VcCheY3* towards its activation, we prepared three mutants *VcCheY3*-Q97A, *VcCheY3*-Q97A/E100A and *VcCheY3*-D60A. Since W61 is within the Forster distance of D60, tryptophan quenching study was performed with *VcCheY3* and its mutants to monitor the phosphorylation event using acetyl phosphate (acP) as substrate. Interestingly, *VcCheY3* showed very low quenching (Figure 3a) indicating that phosphorylation at D60 does not induce any conformational change in W61 and W61 remains buried even after the treatment with acP. *VcCheY3*-Q97A and *VcCheY3*-Q97A/E100A, on the other hand, showed considerable quenching in the presence of acP (Figure 3a), suggesting that in the absence of the hydrogen bond between T90 and Q97 (and also in absence of E100), conformational alteration of W61 may take place more easily and it can move toward the surface of the molecule. As expected, quenching is almost negligible for the nonphosphorylatable analog *VcCheY3*-D60A (Figure 3a). Based on these experiments we have calculated the  $K_m$  ( $K_m = K_s \cdot k_3/k_2$ )

values where a higher  $K_m$  value implies a decrease in the binding affinity between CheY and the phosphodonor (i.e. larger  $K_s$ ), a slower rate of phosphorylation of bound CheY (i.e. smaller  $k_2$ ) or a faster rate of autodephosphorylation (i.e. larger  $k_3$ ) [35].  $K_m$  value, obtained by us, was the highest for VcCheY3 ( $6.4 \pm 0.45$  mM) followed by VcCheY3-Q97A ( $2.3 \pm 0.4$  mM) and VcCheY3-Q97A/E100A ( $2.0 \pm 0.2$  mM) (Figure 3b) which are in accordance with our structural observations.

### Structure of VcCheY3-Q97A

To investigate whether the hydrogen bond between T90 and Q97 affects the hydrophobic packing of W61, M88 and V106, we have solved the structure of VcCheY3-Q97A. As expected, the

overall structure of VcCheY3-Q97A is almost identical to that of VcCheY3 and the  $Mg^{2+}$  ion bound at the active site occupies the equivalent position to that of  $Mg^{2+}$  (or  $Ca^{2+}$ ) of VcCheY3 (Figure 4a). Interestingly, even in the absence of the hydrogen bond between T90 and Q97, the conformation and packing of W61, M88 and V106 are found to be unaltered with respect to the wild type VcCheY3 (Figure 4b). However, the water mediated hydrogen bond between W61 and E100 is not seen in this mutant. E100 is slightly reoriented here and has moved toward the CD1 atom of the adjacent I69 (Figure 4b). These observations, coupled with the quenching results, point to the fact that although the hydrophobic packing of W61, M88 and V106 is independent of the hydrogen bond between T90 and Q97 in free state, in the

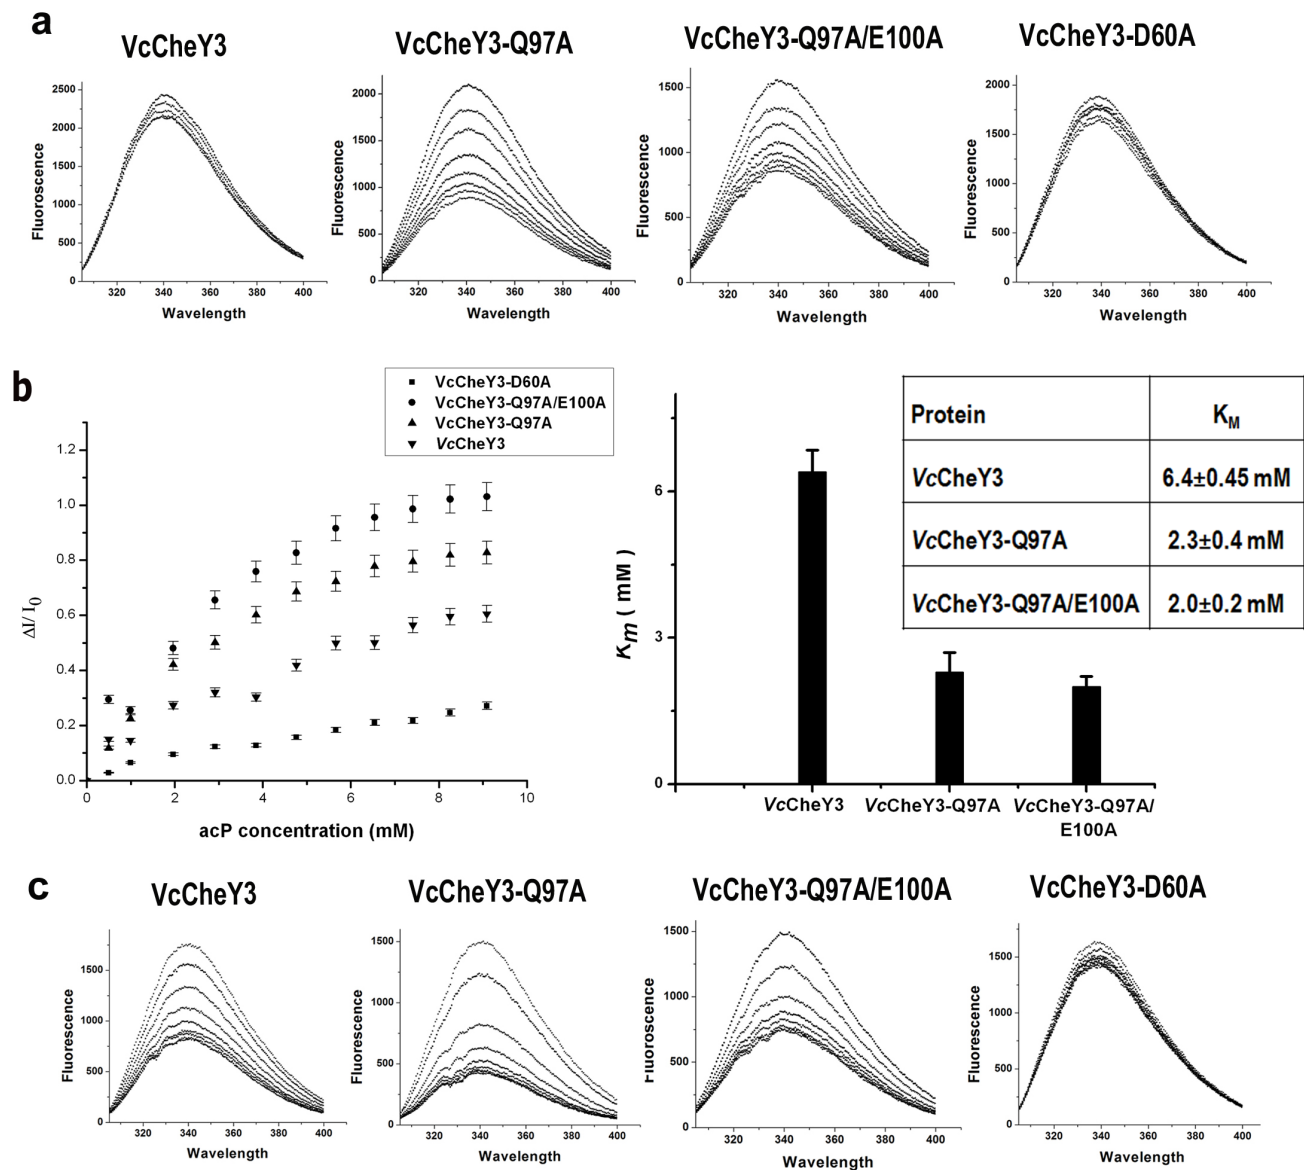

**Figure 3. Activation of VcCheY3 and its mutants, measured through fluorescence quenching.** (a) Tryptophan quenching of VcCheY3 and its different mutants (indicated at top of the figure) using acetyl phosphate (acP) as substrate. (b) Plot of  $\Delta I/I_0$  vs acP concentration (in mM) and corresponding  $K_m$  values (both in graphical and numerical modes); (c) Tryptophan quenching of VcCheY3 and its different mutants (indicated at top of the figure) using  $BeF_3^-$  as substrate. doi:10.1371/journal.pone.0073923.g003

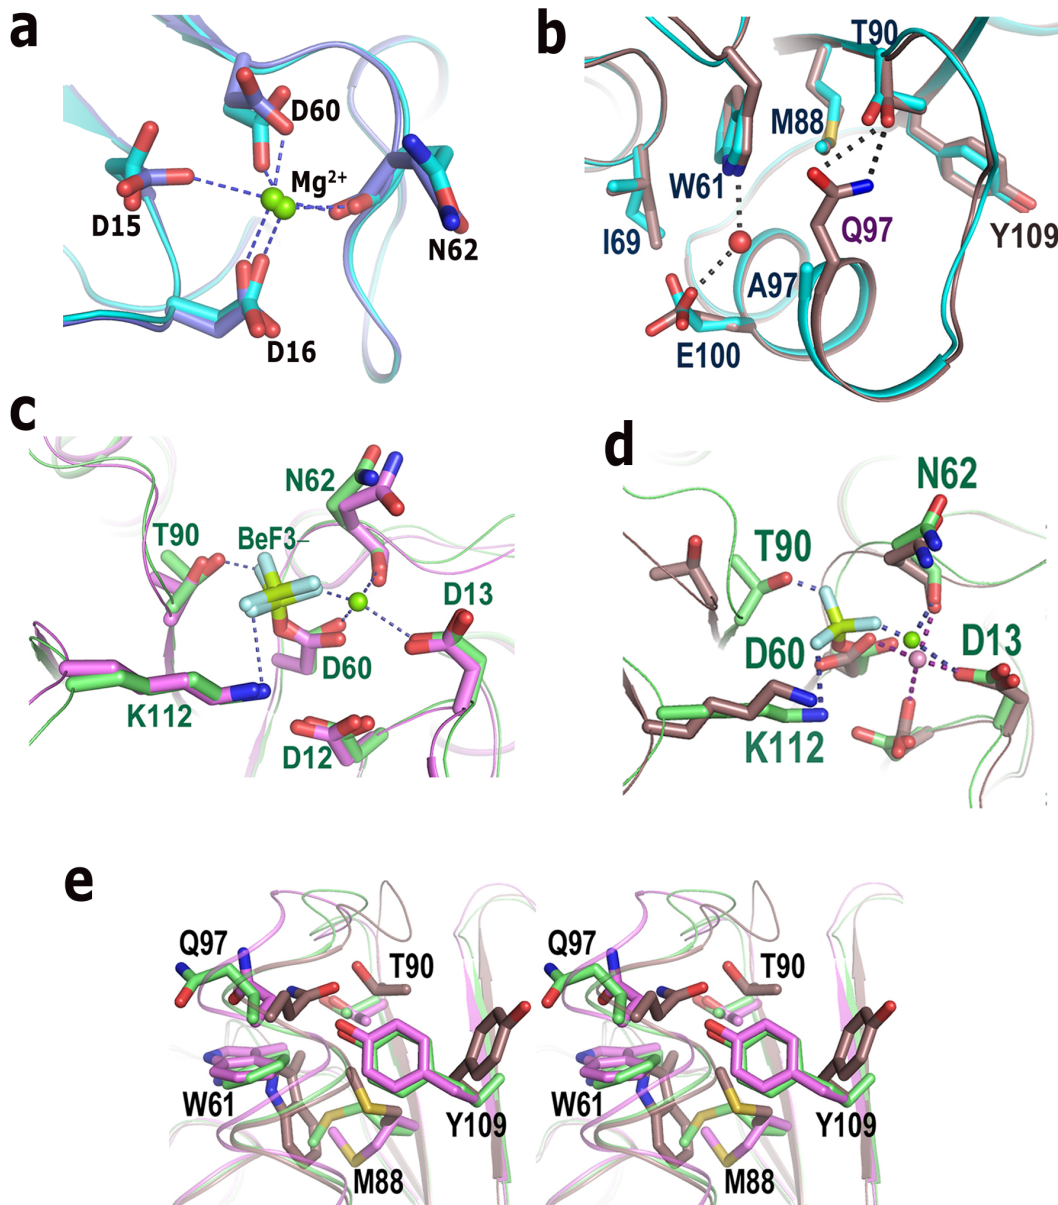

**Figure 4.  $Mg^{2+}$  binding, activation of *VcCheY3* and comparison with *EcCheY*.** (a) Comparison of the  $Mg^{2+}$  binding in *VcCheY3* (blue) and *VcCheY3*-Q97A (cyan); (b) superposition of *VcCheY3* (violet) and *VcCheY3*-Q97A (cyan) showing that the hydrogen bond between Q97 and T90 does not directly influence the conformation of W61 and M88; (c) comparison of the active site of *VcCheY3*- $BeF_3^-$  (green) with *EcCheY3*- $BeF_3^-$  (magenta); (d) comparison of the active site of *VcCheY3*- $BeF_3^-$  (green) with free state *VcCheY3* (violet); (e) stereoscopic representation comparing the 'in' position and the conformation of the neighbouring residues in *VcCheY3*- $BeF_3^-$  (green), *EcCheY3*- $BeF_3^-$  (magenta) with respect to *VcCheY3* (violet). doi:10.1371/journal.pone.0073923.g004

absence of the later interaction, reorientation of W61 and M88 occurs more smoothly upon phosphorylation.

#### Structure of *VcCheY3*- $BeF_3^-$

Quenching data using acP (Figure 3a) clearly indicate that obtaining of stable *VcCheY3*-P for crystallographic study is not possible. Since  $BeF_3^-$  readily forms persistent activated complexes with many response regulators, regardless of the half-lives of their phosphorylated states, this is regularly used to structurally mimic the phosphorylated state of the response regulators [36]. Fluorescence quenching experiment for *VcCheY3* and its mutants,

performed in the presence of  $BeF_3^-$ , showed approximately 30 fold lowering of the  $K_m$  values ( $219.0 \pm 0.6 \mu M$ ,  $110.0 \pm 2.1 \mu M$ , and  $96.4 \pm 1.4 \mu M$  for *VcCheY3*, *VcCheY3*-Q97A and *VcCheY3*-Q97A/E100A respectively) compared to that of acP (Figure 3c). Thus, to visualize the structural changes in *VcCheY3* upon phosphorylation, we have activated *VcCheY3* using  $BeF_3^-$  and solved the structure of *VcCheY3*- $BeF_3^-$  to 2.1 Å.

The active site of *VcCheY3*- $BeF_3^-$  largely resembles to that of *EcCheY*- $BeF_3^-$  (PDB code: 1F4V) (Figure 4c). In *VcCheY3*- $BeF_3^-$ ,  $BeF_3^-$  is covalently linked with D60 and  $Mg^{2+}$  is properly poised to interact with  $BeF_3^-$  (Figure 4c, 4d). To stabilize the



bound  $\text{BeF}_3^-$ , the side chain of K112 reorients and T90 along with the  $\beta 4\alpha 4$  loop moves toward the active site with a conformational change, hallmark for the activation of this type of CheYs (Figure 4d). The hydrogen bond between T90 and Q97 is abolished and Q97 side chain moves away from T90 (Figure 4e). Breaking the hydrophobic packing with M88, the side chain of W61 moves toward the surface (with  $\chi 1$  of  $-166^\circ$ ,  $\chi 2$  of  $-34^\circ$ ) acquiring a conformation similar to that observed in *Ec*CheY- $\text{BeF}_3^-$  (Figure 4e). Under that situation, M88 occupies the space left by W61 and creates a pocket, sufficient to accommodate the 'in' position of Y109 which is essential for FliM binding (Figure 4e).

### Free and Sulfated Structures of *Vc*CheY4

Although the overall structures of *Vc*CheY4<sup>free</sup> and *Vc*CheY4<sup>sulf</sup> are similar, substantial conformational differences are observed between these two, especially around the active site, in helix  $\alpha 4$  and  $\beta 4\alpha 4$  loop. A  $\text{Ca}^{2+}$  ion is located at the active site of *Vc*CheY4<sup>sulf</sup> which coordinates with D9, D52 and main chain carbonyl oxygen of N54 with an average coordination distance of 2.4 Å (Figure 5a; Figure S2a). A tetrahedral positive electron density was observed in the active-site pocket of *Vc*CheY4<sup>sulf</sup> during refinement which was interpreted as a sulfate ion because *Vc*CheY4 was crystallized using ammonium sulfate as precipitant (Figure S2a). In contrast to that, neither a metal ion nor a sulfate ion was observed at the active site of *Vc*CheY4<sup>free</sup> although both of these components were added during crystallization (Figure 5a; Figure S2b). Absence of the divalent metal ion do not cause any change in the side chain conformation of D9 and D52 compared to *Vc*CheY4<sup>sulf</sup>, but the carbonyl oxygen of N54 points away from the metal binding side (Figure 5a). As a result, the  $\beta 3\alpha 3$  loop of *Vc*CheY4<sup>free</sup> takes a different conformation and moves about 3 Å away from the active site (Figure 5a). In *Vc*CheY4<sup>free</sup>, helix  $\alpha 4$  is shorter and  $\beta 4\alpha 4$  loop is unusually longer compared to those of *Vc*CheY4<sup>sulf</sup> (Figure 1c). Electron density around the  $\beta 4\alpha 4$  loop of *Vc*CheY4<sup>free</sup> is shown in the Figure S2c. The plot of B'-values indicated that the crystallographic B-factor of the  $\beta 4\alpha 4$  loop is much lower in *Vc*CheY4<sup>sulf</sup> compared to that of *Vc*CheY4<sup>free</sup> (Figure 5b). In *Vc*CheY4<sup>sulf</sup> part of the  $\beta 4\alpha 4$  loop is stabilized and adopts a helical structure effectively extending the length of  $\alpha 4$  (Figure 5c) and overall, the *Vc*CheY4<sup>sulf</sup> structure seems to be more compact compared to *Vc*CheY4<sup>free</sup>.

The location of the sulfate ion at the active site of *Vc*CheY4<sup>sulf</sup> is somewhat similar to  $\text{BeF}_3^-$  of *Vc*CheY3- $\text{BeF}_3^-$  (Figure 5a). T82 and K104, which are well known to stabilize the phosphoryl group in the other reported CheY structures, stabilize the sulfate ion in *Vc*CheY4<sup>sulf</sup> through hydrogen bonding. A movement of about 2 Å towards the active site occurs for T82 along with the  $\beta 4\alpha 4$  loop (Figure 5a). Interestingly, in *Vc*CheY4<sup>sulf</sup>, an additional hydrogen is generated between T82 and K89 (K89 corresponds to Q97 of *Vc*CheY3) which might further contribute to the compactness of  $\alpha 4$  in *Vc*CheY4<sup>sulf</sup> (Figure 5a, 5c).

The crucial residue at  $\beta 5$  that acquires 'in' position upon activation is a Trp (W101) in case of *Vc*CheY4 and in both the structures of *Vc*CheY4 the side chain of W101 acquired 'in' position. In fact, this is the first structure of a naturally occurring CheY where Trp at this crucial position is observed to spontaneously occupy 'in' position, even without activation. In this case, W101 fits in a hydrophobic pocket made of V53, F61 and M80 (Figure 5c) and apart from making a hydrogen bond with T82, the hydrophobic part of K89 packs with W101 further contributing to the stability of *Vc*CheY4<sup>sulf</sup>.

### Molecular Mechanism of FliM Binding in *V. Cholerae*

To investigate the binding ability of *Vc*CheY3 and *Vc*CheY4 with *Vc*FliM, we performed an *in-vitro* pull down assay. *Vc*FliM<sub>NM</sub> (a construct having the N-terminal and the middle domain of *Vc*FliM with a C-terminal 6×His-tag) was immobilized on Ni-NTA resin, which was then incubated with *Vc*CheY3, *Vc*CheY3-Q97A, *Vc*CheY3-Q97A/E100A, *Vc*CheY3-D60A and *Vc*CheY4, individually, in presence of  $\text{Mg}^{2+}$  but with or without  $\text{BeF}_3^-$ . Our results showed that while the activated *Vc*CheY3, *Vc*CheY3-Q97A and *Vc*CheY3-Q97A/E100A can interact with *Vc*FliM<sub>NM</sub>, *Vc*CheY3-D60A and *Vc*CheY4 do not show any significant interaction with *Vc*FliM<sub>NM</sub> even in presence of  $\text{BeF}_3^-$  and  $\text{Mg}^{2+}$  (Figure 6a). *Vc*CheY3-D60A was used as the negative control, and the experiment performed with  $\text{BeF}_3^-$  and without *Vc*FliM<sub>NM</sub> quantified the basal level of adherence of *Vc*CheYs in Ni-NTA agarose during experiment.

To identify the structural features of *Vc*CheY3 and *Vc*CheY4, responsible for the difference in affinity towards *Vc*FliM, it was necessary to critically analyse their FliM binding surface. To start with, we prepared a model of the N-terminal 16 peptide of *Vc*FliM<sub>N</sub> by 3D-JIGSAW and *Vc*FliM<sub>N</sub>, thus prepared, was docked at the FliM binding face of *Vc*CheY3- $\text{BeF}_3^-$  and *Vc*CheY4<sup>sulf</sup>. The FliM<sub>N</sub> part of the coordinates of *Ec*FliM<sub>N</sub>-*Ec*CheY- $\text{BeF}_3^-$  complex structure (PDB code: 1F4V) were used as a template to prepare the model of *Vc*FliM<sub>N</sub> and *Ec*FliM<sub>N</sub>-*Ec*CheY structure as a whole was used as template for the docking. The resulting models of *Vc*FliM<sub>N</sub>-*Vc*CheY3- $\text{BeF}_3^-$  or *Vc*FliM<sub>N</sub>-*Vc*CheY4<sup>sulf</sup> were then analysed to identify the structural determinants responsible for the differential FliM binding of *Vc*CheY3 and *Vc*CheY4. *Vc*FliM<sub>N</sub> is observed to fit properly at the  $\alpha 4$ - $\beta 5$ - $\alpha 5$  cleft of *Vc*CheY3- $\text{BeF}_3^-$  with considerable number of hydrogen bonds and hydrophobic interactions (Figure 6b, 6c) which are comparable with those of *Ec*FliM<sub>N</sub>-*Ec*CheY- $\text{BeF}_3^-$  (Table 3). In contrast to that, the probable interactions of *Vc*CheY4<sup>sulf</sup> with *Vc*FliM<sub>N</sub> are inadequate (Figure 6d, 6e; Table 3). The FliM binding face of *Vc*CheY4<sup>sulf</sup> is not compatible enough for *Vc*FliM. In *Vc*CheY4<sup>sulf</sup>, the space between  $\alpha 4$  and  $\alpha 5$  is  $\sim 2$  Å wider compared to that of *Vc*CheY3- $\text{BeF}_3^-$  which might cause a loose fit of *Vc*FliM<sub>N</sub> at  $\alpha 4$ - $\beta 5$ - $\alpha 5$  face of *Vc*CheY4<sup>sulf</sup>. Residues T2 and D3 of *Vc*FliM<sub>N</sub> are found to interact with *Vc*CheY3- $\text{BeF}_3^-$ , but no such interaction is possible with *Vc*CheY4<sup>sulf</sup> (Figure 6c, 6e). Furthermore, in *Vc*CheY3- $\text{BeF}_3^-$ , K122 of  $\alpha 5$  is poised to form a salt bridge with D12 of *Vc*FliM<sub>N</sub>, corresponding residue of *Vc*CheY4<sup>sulf</sup> is T114 which is spatially away from D12 of *Vc*FliM<sub>N</sub> and naturally no interaction is expected between this pair (Figure 6e). As a result, the overall interactions between *Vc*FliM<sub>N</sub> and *Vc*CheY4<sup>sulf</sup> are reduced significantly (Figure 6e, Table 3) supporting the observation of the pull down assay (Figure 6a).

### Discussion

Unlike *E. coli* two-component chemosensory pathway that relies on a single copy of response regulator CheY, *V. cholerae* possesses four CheY homologues. Occurrence of multiple CheYs is not unusual in bacteria as these are also found in *R. sphaeroides* and *B. burgdorferi* [5]. Recent studies have demonstrated that multiple copies of CheY play specific roles in the chemotactic signal transduction mechanisms. As for example, among the three CheYs of *B. burgdorferi* only CheY3 directly regulates motor action while the other two cannot bind to the motor and act as signal terminating phosphate sink [37]. Similarly, in *R. sphaeroides* only CheY6 can change the direction of the flagellar motor, although the others bind FliM probably to regulate the level of the phosphodonor [38,39]. An intriguing question, therefore, arises

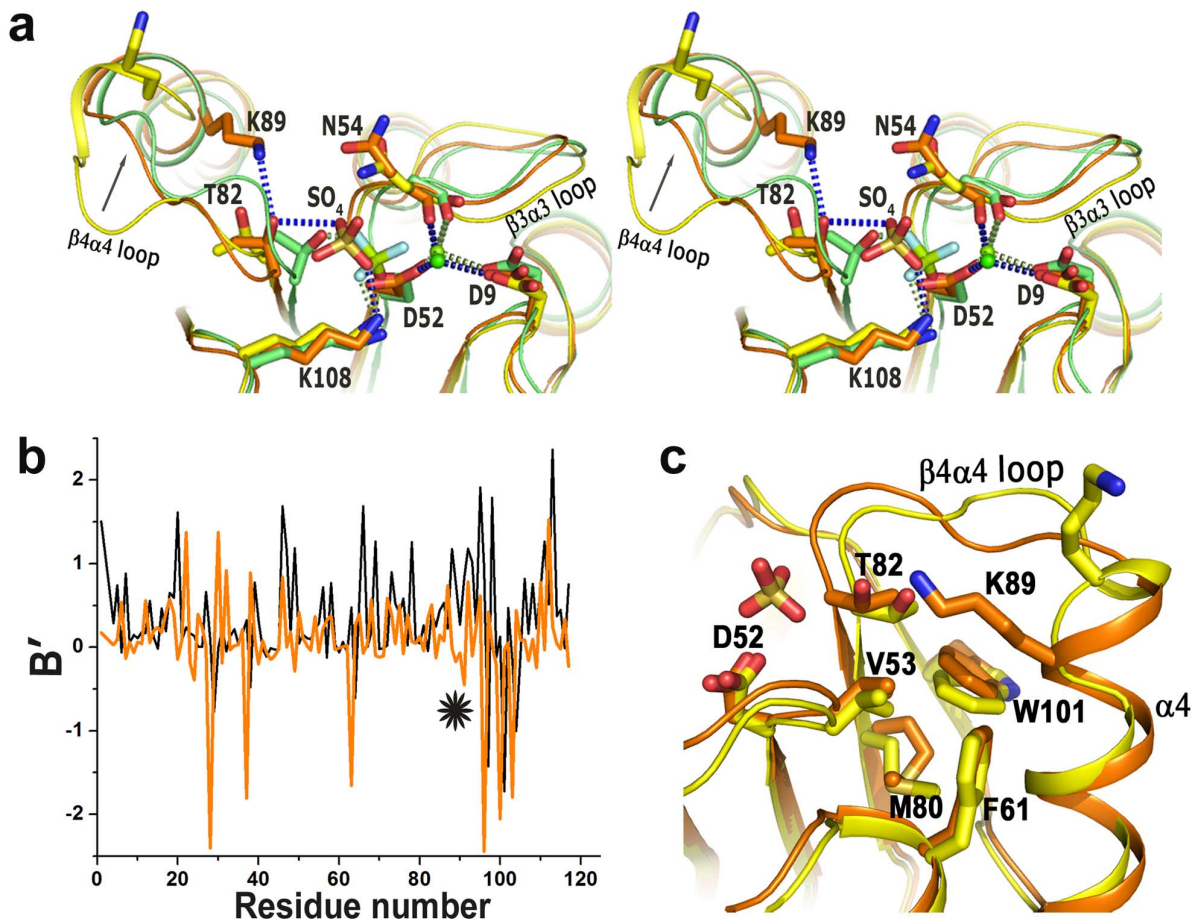

**Figure 5. Structure of *VcCheY4* in free and sulphated states.** (a) stereo view of the superposition of *VcCheY4*<sup>free</sup> (yellow) and *VcCheY4*<sup>sulf</sup> (orange) on activated *VcCheY3*-BeF<sub>3</sub><sup>-</sup> (green) showing the location and the interactions of the sulfate ion in *VcCheY4*<sup>sulf</sup>, relative movement of T82, hydrogen bond between K89 and T82 in *VcCheY4*<sup>sulf</sup> and the interactions of the metal ion with the neighbouring residues; (b) B' plot of *VcCheY4*<sup>free</sup> (black) and *VcCheY4*<sup>sulf</sup> (orange) showing reduction of flexibility of the  $\beta 4\alpha 4$  loop (\*) in *VcCheY4*<sup>sulf</sup>; (c) superposition of *VcCheY4*<sup>free</sup> (yellow) on *VcCheY4*<sup>sulf</sup> (orange) showing the conformational difference at the  $\beta 4\alpha 4$  loop and packing of W101 in its exclusive 'in' position.  
doi:10.1371/journal.pone.0073923.g005

about the role of multiple copies of CheY in *V. Cholerae*, especially of *VcCheY3* and *VcCheY4*.

Together, phosphorylation at the active site Asp, hallmark movement of the Thr and the  $\beta 4\alpha 4$  loop toward the active site to stabilize the bound phosphate, 'in' positioning of the crucial hydrophobic residue of  $\beta 5$  and FlIM binding at the  $\alpha 4$ - $\beta 5$ - $\alpha 5$  face to reverse the flagellar motion constitute the general mode of action of the chemotactic response regulators. In *EcCheY* or *SrCheY*, a preformed pocket was seen to accommodate the 'in' position of the crucial  $\beta 5$  residue Y106 upon activation (Figure 2b). In contrast to that, in *VcCheY3*, this pocket is preoccupied by the hydrophobic packing of W61, M88 and V106 (Figure 2c). A unique hydrogen bond between T90 and Q97 additionally restricts the outward movement of W61, which is necessary to make a pocket for the 'in' positioning of Y109. This hydrogen bond also obstructs the movement of T90 toward the active site essentially hindering the stabilization of the phosphoryl group by T90. *VcCheY3* shows minimum quenching in the presence of acP which further support the hindered movement of W61 upon phosphorylation at D60 (Figure 3a). *VcCheY3*-Q97A and *VcCheY3*-Q97A/E100A, on the other hand, show considerable quenching in the presence of acP indicating that in the absence of

the hydrogen bond between T90 and Q97, W61 can easily be reoriented toward solvent and T90 can move toward the active site to stabilize the phosphoryl group.

Higher  $K_m$  value of *VcCheY3* compared to its mutants *VcCheY3*-Q97A and *VcCheY3*-Q97A/E100A further establishes the hindrance caused by the hydrogen bond between T90 and Q97 in stabilizing the acyl phosphate on D60. The lower  $K_m$  values of *VcCheY3*-Q97A and *VcCheY3*-Q97A/E100A are due to the loss of the coupling between T90 and Q97 which facilitates the movement of T90 toward the active site and stabilize the acyl phosphate. A comparison of the  $K_m$  value of *VcCheY3* with the CheYs from *Helicobacter pylori* or *E. coli* shows that the  $K_m$  of *VcCheY3* is also higher than that of *HpCheY1* ( $1.07 \pm 0.31$  mM) and *EcCheY* ( $3.2 \pm 0.4$  mM). As mentioned by Lam et al. (2010),  $K_m$  increases with the increase in the ionic strength of the buffer used in the experiment [24]. While 200 mM salt was used in the experiment of *EcCheY*, only 50 mM salt was used for *HpCheY1* and *VcCheY3* (and its mutants). Since our experimental condition is same as that of *HpCheY1*, we can clearly infer that the  $K_m$  value of *VcCheY3* is about six fold higher than that of *HpCheY1*.

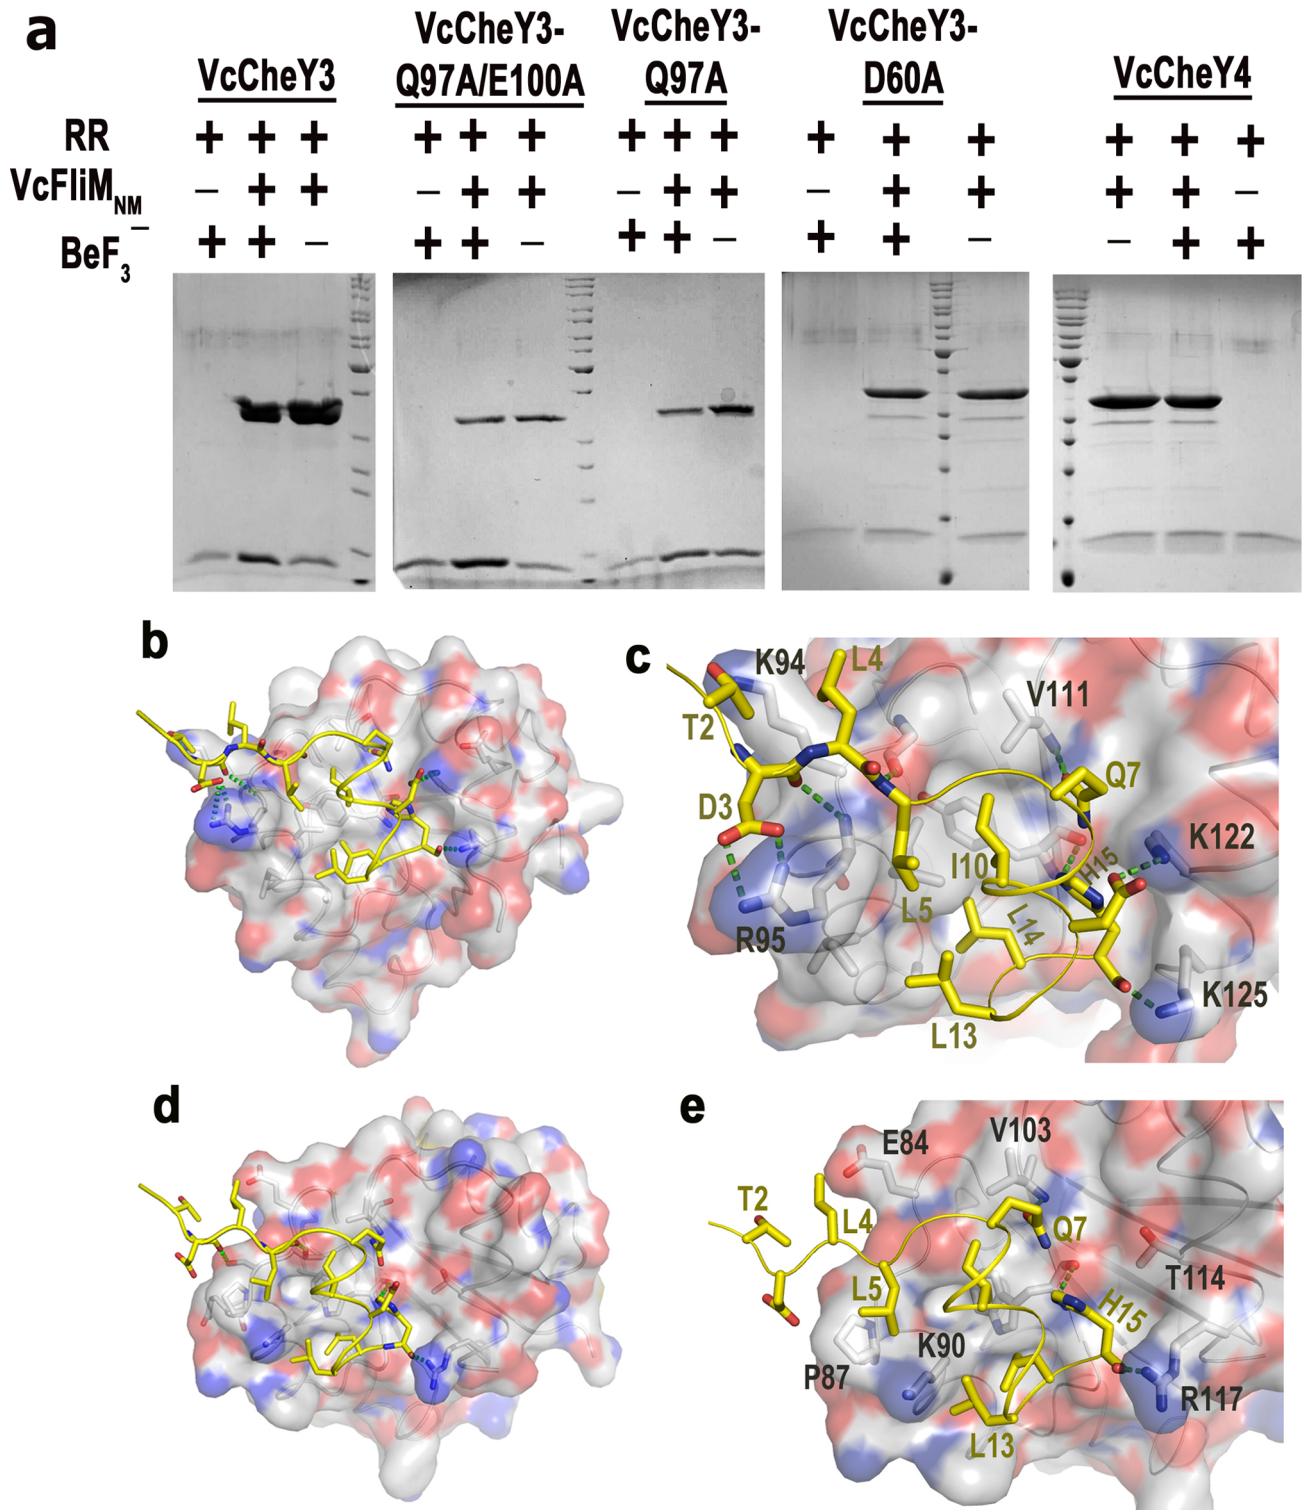

**Figure 6. Interactions of FlIM<sub>NM</sub> with VcCheY3, VcCheY4 and VcCheY3 mutants.** (a) Pull-down assays of VcCheY3, VcCheY3-Q97A, VcCheY3-Q97A/E100A, VcCheY3-D60A and VcCheY4 with VcFlIM<sub>NM</sub>. Purified VcFlIM<sub>NM</sub> in 0.2 mg/ml was immobilized on pre-washed resin. VcCheY3, VcCheY3-D60A and VcCheY4 in a 1:1 molar ratio to VcFlIM<sub>NM</sub> was incubated with immobilized VcFlIM<sub>NM</sub> with or without BeF<sub>3</sub><sup>-</sup> at 25°C for 10 mins; (b) Docking of VcFlIM<sub>N</sub> (16 residues) at the FlIM binding face of VcCheY3-BeF<sub>3</sub><sup>-</sup>; (c) Zoomed view of (b) showing the probable interactions in detail; (d) Docking of VcFlIM<sub>N</sub> (16 residue) at the probable FlIM binding face of VcCheY4<sup>sufr</sup>; (e) Zoomed view of (d) showing the probable interactions in detail.  
doi:10.1371/journal.pone.0073923.g006



**Table 3.** Residues of *Vc*FliM<sub>N</sub> model, involved in the probable interactions with *Vc*CheY3 and *Vc*CheY4 structures, are compared with that of *Ec*FliM-*Ec*CheY structure.

| <i>Ec</i> CheY3-BeF <sub>3</sub> <sup>-</sup> | <i>Ec</i> FliM <sub>N</sub> | <i>Vc</i> CheY3-BeF <sub>3</sub> <sup>-</sup> | <i>Vc</i> FliM <sub>N</sub> | <i>Vc</i> CheY4 |
|-----------------------------------------------|-----------------------------|-----------------------------------------------|-----------------------------|-----------------|
| <i>Polar interactions</i>                     |                             |                                               |                             |                 |
| K91                                           | D3                          | K94 NZ                                        | T3 OG1                      | -               |
| K92 N                                         | S4 O                        | R95 N                                         | D4 O                        | -               |
|                                               |                             | R95 NH1, NH2                                  | D4 OD1, OD2                 | -               |
| A90 O                                         | L6, N                       | A93 O                                         | L6 N                        | T85 O           |
| V108 N                                        | Q8 OE1                      | V111 N                                        | Q8 OE1                      | V104 N          |
| K119                                          | D12                         | K122 NZ                                       | D12 OD1                     | -               |
| Y106 N                                        | D16 OD1                     | Y109 O                                        | H16 NE2                     | -               |
| Y106 O                                        | D16 N                       |                                               |                             |                 |
| K122 NZ                                       | D16 O                       | K125 NZ                                       | H16 O                       | R117 NH1        |
| <i>Hydrophobic interactions</i>               |                             |                                               |                             |                 |
| I95                                           | L6                          | R95, I98                                      | L6                          | P87             |
| I95, A99, Y106                                | I11, L14                    | I98, I99, Y109, V106, A102                    | I11, L14, L15               | K90, W101       |

doi:10.1371/journal.pone.0073923.t003

As mentioned earlier, a higher  $K_m$  ( $K_m = K_s \cdot k3/k2$ ) implies a decrease in the binding affinity between CheY and the phosphodonor (larger  $K_s$ ), a slower rate of phosphorylation of CheY (smaller  $k2$ ) or a faster rate of autodephosphorylation (larger  $k3$ ) [35]. The high  $K_m$  value of *Vc*CheY3 implies that either its phosphorylation occurs slowly or it has a higher rate of autodephosphorylation. Based on the swarming assay and swimming behaviour Hyakutake et al, (2005) reported that only the *Vc*CheY3 directly switches the flagellar rotation [14]. Our pull down assay shows that *Vc*CheY3 and its mutants *Vc*CheY3-Q97A and *Vc*CheY3-Q97A/E100A bind *Vc*FliM<sub>NM</sub> efficiently in the presence of BeF<sub>3</sub><sup>-</sup> and Mg<sup>2+</sup>. Docking results suggest that *Vc*FliM<sub>N</sub> can fit properly at the  $\alpha4$ - $\beta5$ - $\alpha5$  face of the activated *Vc*CheY3 with significant number of hydrogen bonding and hydrophobic interactions (Figure 6a, 6b; Table 3). Moreover, sequence comparison of *Vc*CheY3 with *Ec*CheY or *St*CheY denotes that the crucial residues implicated in binding the kinase CheA are conserved in *Vc*CheY3 (Figure 1a). These observations indicate that although *Vc*CheY3 has all the requisites for the phosphorylation, stabilization of the acyl phosphate is hindered due to the obstructed movement of T90 towards the active site. Lesser stabilization of the bound phosphate might be implicated in enhanced autodephosphorylation (larger  $k3$ ) for *Vc*CheY3, effectively causing lower rate of activation which is reflected in its higher  $K_m$  value. The conformational barrier of *Vc*CheY3, therefore, acts as a molecular switch to control the level of *Vc*CheY3-P. Elevated temperature and/or adequacy of phosphate pool might break the barrier of the free-state *Vc*CheY3 and flip it to the phosphorylated state for FliM binding.

Two distinct conformations, differing at helix  $\alpha4$  and the crucial  $\beta4\alpha4$  loop, are observed for *Vc*CheY4. Among these two structures, *Vc*CheY4<sup>sulf</sup> possesses a bound sulfate ion near the active site which occupies a position similar to the BeF<sub>3</sub><sup>-</sup> of *St*CheY-BeF<sub>3</sub><sup>-</sup> and *Vc*CheY3-BeF<sub>3</sub><sup>-</sup> (Figure 5a). A bound sulfate ion was also observed in *Hp*CheY1 structure (PDB code: 3GWG) where that sulfate ion caused conformational changes similar to the activated structure [24]. However, in *Hp*CheY1, along with the conventional conformational changes, an unusual orientation

of D53 was observed [24]. In *Vc*CheY4<sup>sulf</sup>, the sulfate ion did not alter the side chain conformation of catalytic D52 but stayed very close ( $\sim 2.5$  Å) to it (Figure 5a). Since *Vc*CheY4<sup>sulf</sup> was crystallized at pH 4.0, at this pH D52 might be protonated allowing the sulfate ion to come to its close vicinity. In *Vc*CheY4<sup>sulf</sup>, the sulfate ion is properly coordinated with the Ca<sup>2+</sup> ion and is stabilized through the interactions with T82 and K104 (Figure 5a). Considering the compactness of the *Vc*CheY4<sup>sulf</sup> structure having a shorter  $\beta4\alpha4$  loop with low B-factors, long  $\alpha4$  helix, movement of T82 and  $\beta4\alpha4$  loop to stabilize the sulfate ion and additional hydrogen bond between T82 and K89, it can be said that *Vc*CheY4 has a strong tendency to be phosphorylated in the presence of a divalent metal ion and the phosphorylated state is more stable compared to its free state.

Despite the fact that the crucial  $\beta5$  residue W101 of *Vc*CheY4 consistently acquires 'in' position, *Vc*CheY4 fails to interact with *Vc*FliM<sub>NM</sub> (Figure 6a). Through mutagenesis and structure-function studies Matsumura and collaborators showed that substitution of Y106 of *Ec*CheY with tryptophan (Y106W) produces a phosphorylation-dependent, hyperactive mutant that generates mainly clockwise rotational bias upon interacting with FliM [40]. In contrast to that, despite the consistent 'in' position of W101, *Vc*CheY4 does not interact with *Vc*FliM, as the N terminal part of *Vc*FliM does not fit at the  $\alpha4$ - $\beta5$ - $\alpha5$  face of *Vc*CheY4 because of their spatial and electrostatic incompatibility (Table 3, Figure 6c). This apparent contradiction suggest that FliM binding by CheY is not just influenced by the 'in' positioning of the  $\beta5$  hydrophobic residue but the spatial and electrostatic compatibility of the  $\alpha4$ - $\beta5$ - $\alpha5$  face of CheY with the N-terminal part of FliM plays a vital role in this process. Since, CheZ and FliM share a common face of CheY for binding with similar mode of interactions [41], *Vc*CheY4 is expected not to interact efficiently with CheZ as well. This observation corroborates with the fact that no *cheZ* is found in the cluster III where *cheY4* is located. Since *Vc*CheY4 can be phosphorylated but cannot bind FliM and probably not CheZ as well, *Vc*CheY4 might act as phosphate sink or it might induce the expression of some other genes upon phosphorylation which can indirectly modulate flagellar action and/or virulence.

*Vc*CheY4 was seen to slightly enhance the spreading of an *E. coli cheZ* mutant in semisolid agar and based on that Hyakutake et al proposed that *Vc*CheY4 can affect chemotaxis by removing a phosphoryl group from *Vc*CheY3 [14]. Our observations intend us to hypothesise that if a phosphate pull is shared by *Vc*CheY3 and *Vc*CheY4 then *Vc*CheY4 can cause a phosphate depleted situation for *Vc*CheY3, as phosphorylated state of *Vc*CheY4 is more stable compared to its unphosphorylated state, which is other way round for *Vc*CheY3. Alternatively, in a phosphate depleted situation, additional energy might help phosphorylated *Vc*CheY4 to release the phosphoryl group through conformation dependent autodephosphorylation, as proposed by Pazy et al., 2009 [42] based on their observations of the mutant *Ec*CheY.

## Supporting Information

**Figure S1 Metal binding in *Vc*CheY3.** (a) Electron density maps ( $2F_o - F_c$ ) around the active site of *Vc*CheY3 contoured at 1.2  $\sigma$  level, Ca<sup>2+</sup> is shown in pink sphere and water molecules as red dots. Ca<sup>2+</sup> binding residues are labelled; (b) Electron density maps ( $2F_o - F_c$ ) around the active site of *Vc*CheY3 contoured at 1.0  $\sigma$  level, Mg<sup>2+</sup> is shown as white star and waters are shown in red stars. Mg<sup>2+</sup> binding residues are labelled. (DOCX)

**Figure S2 Electron density map of *Vc*CheY4.** Electron density map ( $2F_o - F_c$ ) contoured at 1.0  $\sigma$  level (a) around the active



site of  $VcCheY4^{sulf}$  in stereo, (b) around the active site of  $VcCheY4^{free}$ , (c) around the  $\beta 4\alpha 4$  loop of  $VcCheY4^{free}$ . (DOCX)

**Figure S3 Interaction of W61 with E100.** (a) Electron density map ( $2F_o - F_c$ ) contoured at 1.0  $\sigma$  level around the water molecule that connects W61, M88, E100 along with the water molecule in  $Ca^{2+}$  bound  $VcCheY3$ ; (b) Water mediated interaction of W61 with E100 in  $Mg^{2+}$  bound  $VcCheY3$ . (DOCX)

**Supporting Information S1.**  
(PDF)

## Acknowledgments

We are extremely thankful to Prof. Anirban Siddhanta of the Dept of Biochemistry, University of Calcutta and Prof. Abhijit Chakrabarti of SINP

## References

- Butler SM, Camilli A (2004) Both chemotaxis and net motility greatly influence the infectivity of *Vibrio cholerae*. *Proc Natl Acad Sci U S A* 101: 5018–5023.
- Freter R, Jones GW (1976) Adhesive properties of *Vibrio cholerae*: nature of the interaction with intact mucosal surfaces. *Infect Immun* 14: 246–256.
- Boin MA, Austin MJ, Hase CC (2004) Chemotaxis in *Vibrio cholerae*. *FEMS Microbiol Lett* 239: 1–8.
- Eisenbach M (1990) Functions of the flagellar modes of rotation in bacterial motility and chemotaxis. *Mol Microbiol* 4: 161–167.
- Wuichet K, Zhulin IB (2010) Origins and diversification of a complex signal transduction system in prokaryotes. *Sci Signal* 3: ra50.
- Szumant H, Ordal GW (2004) Diversity in chemotaxis mechanisms among the bacteria and archaea. *Microbiol Mol Biol Rev* 68: 301–319.
- Mauriello EM, Mignot T, Yang Z, Zusman DR (2010) Gliding motility revisited: how do the myxobacteria move without flagella? *Microbiol Mol Biol Rev* 74: 229–249.
- Bhaya D, Takahashi A, Grossman AR (2001) Light regulation of type IV pilus-dependent motility by chemosensor-like elements in *Synechocystis* PCC6803. *Proc Natl Acad Sci U S A* 98: 7540–7545.
- Black WP, Schubot FD, Li Z, Yang Z (2010) Phosphorylation and dephosphorylation among Dif chemosensory proteins essential for exopolysaccharide regulation in *Myxococcus xanthus*. *J Bacteriol* 192: 4267–4274.
- Berleman JE, Bauer CE (2005) A che-like signal transduction cascade involved in controlling flagella biosynthesis in *Rhodospirillum rubrum*. *Mol Microbiol* 55: 1390–1402.
- Porter SL, Roberts MA, Manning CS, Armitage JP (2008) A bifunctional kinase-phosphatase in bacterial chemotaxis. *Proc Natl Acad Sci U S A* 105: 18531–18536.
- Heidelberg JF, Eisen JA, Nelson WC, Clayton RA, Gwinn ML, et al. (2000) DNA sequence of both chromosomes of the cholera pathogen *Vibrio cholerae*. *Nature* 406: 477–483 *Vibrio cholerae*. *Innate Immun* 15: 131–142.
- Banerjee R, Das S, Mukhopadhyay K, Nag S, Chakraborty A, et al. (2002) Involvement of in vivo induced cheY-4 gene of *Vibrio cholerae* in motility, early adherence to intestinal epithelial cells and regulation of virulence factors. *FEBS Lett* 532: 221–226.
- Hyakutake A, Homma M, Austin MJ, Boin MA, Hase CC, et al. (2005) Only one of the five CheY homologs in *Vibrio cholerae* directly switches flagellar rotation. *J Bacteriol* 187: 8403–8410.
- Bandyopadhyaya A, Chaudhuri K (2009) Differential modulation of NF- $\kappa$ B-mediated pro-inflammatory response in human intestinal epithelial cells by cheY homologues of *Vibrio cholerae*. *Innate Immun* 15(3): 131–142.
- Stock AM, Mottonen JM, Stock JB, Schutt CE (1989) Three-dimensional structure of CheY, the response regulator of bacterial chemotaxis. *Nature* 337: 745–749.
- Volz K, Matsumura P (1991) Crystal structure of *Escherichia coli* CheY refined at 1.7-Å resolution. *J Biol Chem* 266: 15511–15519.
- Bourret RB, Hess JF, Simon MI (1990) Conserved aspartate residues and phosphorylation in signal transduction by the chemotaxis protein CheY. *Proc Natl Acad Sci U S A* 87: 41–45.
- Zhu X, Rebello J, Matsumura P, Volz K (1997) Crystal structures of CheY mutants Y106W and T87I/Y106W. CheY activation correlates with movement of residue 106. *J Biol Chem* 272: 5000–5006.
- Zhu X, Volz K, Matsumura P (1997) The CheZ-binding surface of CheY overlaps the CheA- and FlM-binding surfaces. *J Biol Chem* 272: 23758–23764.
- Khamrui S, Biswas M, Sen U, Dasgupta J (2010) Cloning, overexpression, purification, crystallization and preliminary X-ray analysis of CheY3, a response regulator that directly interacts with the flagellar ‘switch complex’ in *Vibrio cholerae*. *Acta Crystallogr Sect F Struct Biol Cryst Commun* 66: 944–947.
- Biswas M, Khamrui S, Sen U, Dasgupta J (2011) Overexpression, purification, crystallization and preliminary X-ray analysis of CheY4 from *Vibrio cholerae* O395. *Acta Crystallogr Sect F Struct Biol Cryst Commun* 67: 1645–1648.
- Lukat GS, McCleary WR, Stock AM, Stock JB (1992) Phosphorylation of bacterial response regulator proteins by low molecular weight phospho-donors. *Proc Natl Acad Sci U S A* 89: 718–722.
- Lam KH, Ling TK, Au SW (2010) Crystal structure of activated CheY1 from *Helicobacter pylori*. *J Bacteriol* 192: 2324–2334.
- Collaborative Computational Project N (1994) The CCP4 suite: programs for protein crystallography. *Acta Crystallogr D Biol Crystallogr* 50: 760–763.
- Jones TA, Zou JY, Cowan SW, Kjeldgaard M (1991) Improved methods for building protein models in electron density maps and the location of errors in these models. *Acta Crystallogr A* 47 (Pt 2): 110–119.
- Brunger AT, Adams PD, Clore GM, DeLano WL, Gros P, et al. (1998) Crystallography & NMR system: A new software suite for macromolecular structure determination. *Acta Crystallogr D Biol Crystallogr* 54: 905–921.
- Emsley P, Cowtan K (2004) Coot: model-building tools for molecular graphics. *Acta Crystallogr D Biol Crystallogr* 60: 2126–2132.
- Laskowski RA, MacArthur MW, Thornton JM (1998) Validation of protein models derived from experiment. *Curr Opin Struct Biol* 8: 631–639.
- Parthasarathy S, Murthy MR (1997) Analysis of temperature factor distribution in high-resolution protein structures. *Protein Sci* 6: 2561–2567.
- Carugo O, Argos P (1998) Accessibility to internal cavities and ligand binding sites monitored by protein crystallographic thermal factors. *Proteins* 31: 201–213.
- Yuan Z, Zhao J, Wang ZX (2003) Flexibility analysis of enzyme active sites by crystallographic temperature factors. *Protein Eng* 16: 109–114.
- Bell CH, Porter SL, Strawson A, Stuart DI, Armitage JP (2010) Using structural information to change the phosphotransfer specificity of a two-component chemotaxis signalling complex. *PLoS Biol* 8: e1000306.
- Lee SY, Cho HS, Pelton JG, Yan D, Berry EA, et al. (2001) Crystal structure of activated CheY. Comparison with other activated receiver domains. *J Biol Chem* 276: 16425–16431.
- Silversmith RE, Appleby JL, Bourret RB (1997) Catalytic mechanism of phosphorylation and dephosphorylation of CheY: kinetic characterization of imidazole phosphates as phosphodonors and the role of acid catalysis. *Biochemistry* 36: 14965–14974.
- Cho H, Wang W, Kim R, Yokota H, Damo S, et al. (2001) BeF<sub>3</sub>(-) acts as a phosphate analog in proteins phosphorylated on aspartate: structure of a BeF<sub>3</sub>(-) complex with phosphoserine phosphatase. *Proc Natl Acad Sci U S A* 98: 8525–8530.
- Sourjik V, Schmitt R (1998) Phosphotransfer between CheA, CheY1, and CheY2 in the chemotaxis signal transduction chain of *Rhizobium meliloti*. *Biochemistry* 37: 2327–2335.
- Porter SL, Wadhams GH, Martin AC, Byles ED, Lancaster DE, et al. (2006) The CheYs of *Rhodobacter sphaeroides*. *J Biol Chem* 281: 32694–32704.
- Porter SL, Armitage JP (2004) Chemotaxis in *Rhodobacter sphaeroides* requires an atypical histidine protein kinase. *J Biol Chem* 279: 54573–54580.
- Zhu X, Amsler CD, Volz K, Matsumura P (1996) Tyrosine 106 of CheY plays an important role in chemotaxis signal transduction in *Escherichia coli*. *J Bacteriol* 178: 4208–4215.
- Guhaniyogi J, Wu T, Patel SS, Stock AM (2008) Interaction of CheY with the C-terminal peptide of CheZ. *J Bacteriol* 190: 1419–1428.
- Pazy Y, Wollish AC, Thomas SA, Miller PJ, Collins EJ, et al. (2009) Matching biochemical reaction kinetics to the timescales of life: structural determinants that influence the autodephosphorylation rate of response regulator proteins. *J Mol Biol* 392: 1205–1220.

for generously allowing us to use the spectrofluorometer. JD and MB are grateful to Mr. Abhijit Bhattacharya and Mr. Samir Das of SINP for their technical and academic supports. JD is grateful to Dr. J Felix Raj SJ, Principal, St. Xavier’s College, Kolkata for his encouragement and constant support.

## Accession Codes

Protein Data Bank: Coordinates and structure factor files have been deposited with the accession codes 3TO5, 4HNQ, 4HNS, 4HNR 4H60 and 4LX8 [see Summary Reports in “Supporting Information S1”].

## Author Contributions

Conceived and designed the experiments: JD. Performed the experiments: MB SD SK US. Analyzed the data: MB SD US JD. Wrote the paper: JD US.
