# Supplementary material for: Conformational Barrier of CheY3 and Inability of CheY4 to Bind FliM Control the Flagellar Motor Action in Vibrio cholerae
Source: PubMed Central journal article supplement (PMC3774744; doi:10.1371/journal.pone.0073923), 2013-09-16
Supplement: pone.0073923.s004.pdf [file pone.0073923.s004.pdf]

## wwPDB Validation Report

**TITLE:** HIGH RESOLUTION STRUCTURE OF CHEY3 FROM VIBRIO CHOLERAE  
**AUTHOR(S):** J.DASGUPTA,U.SEN,M.BISWAS

### Summary of PDB Entry Validation

The results of the validation of this PDB entry are shown below. No major issues were found.

### Sequence Validation

The reported biological sequence shows no discrepancy with UniProt sequence (code Q9KQD5).

The reported biological sequence and the sequence given in the coordinates show no discrepancy.

### Ligand Chemistry

**Identifier:** CA  
**Name:** CALCIUM ION  
**Formula:** Ca

| Type                | Program               | Version | Descriptor                  |
|---------------------|-----------------------|---------|-----------------------------|
| SMILES              | ACDLabs               | 10.04   | [Ca+2]                      |
| SMILES<br>CANONICAL | CACTVS                | 3.341   | [Ca++]                      |
| SMILES              | CACTVS                | 3.341   | [Ca++]                      |
| SMILES<br>CANONICAL | OpenEye<br>OEToolkits | 1.5.0   | [Ca+2]                      |
| SMILES              | OpenEye<br>OEToolkits | 1.5.0   | [Ca+2]                      |
| InChI               | InChI                 | 1.03    | InChI=1S/Ca/q+2             |
| InChIKey            | InChI                 | 1.03    | BHPQYMZQTOCNFJ-UHFFFAOYSA-N |

### Summary of Structure Factor Validation

| <b>Structure quality</b>                                                    |        |
|-----------------------------------------------------------------------------|--------|
| Average Real space R-factor (Calculated by SFCHECK, V7.02.4)                | 0.0583 |
| Average Real-space correlation coefficient (Calculated by SFCHECK, V7.02.4) | 0.9916 |
| Average Occupancy-weighted avg temperature factor                           | 20.98  |

| <b>Resolution</b>                                |       |
|--------------------------------------------------|-------|
| High Resolution (Author reported)                | 1.65  |
| High Resolution (Calculated by SFCHECK, V7.02.4) | 1.65  |
| Low Resolution (Author reported)                 | 23.26 |
| Low Resolution (Calculated by SFCHECK, V7.02.4)  | 23.26 |

| <b>Crystal data</b>         |       |
|-----------------------------|-------|
| Space group                 | H 3   |
| Total number of reflections | 14876 |
| Number of reflections used  | 14112 |

| <b>R-factors</b>                               |       |
|------------------------------------------------|-------|
| R-factor (Author reported)                     | 0.202 |
| R-factor (Calculated by SFCHECK, V7.02.4)      | 0.208 |
| Free R-factor (Author reported)                | 0.229 |
| Free R-factor (Calculated by SFCHECK, V7.02.4) | 0.240 |

| <b>Wilson statistics (PHENIX, V1.6-289)</b> |       |
|---------------------------------------------|-------|
| Wilson B-factor                             | 17.08 |
| Wilson Scale                                | 0.35  |

| <b>Padilla-Yeates statistics for twin detection (PHENIX, V1.6-289)</b> |       |
|------------------------------------------------------------------------|-------|
| Padilla-Yeates $\langle  L  \rangle$                                   | 0.476 |
| Padilla-Yeates $\langle L^*L \rangle$                                  | 0.309 |

# wwPDB Validation Report

## Summary of PDB Entry Validation

The results of the validation of this PDB entry are shown below. No major issues were raised during data processing.

### Geometry Validation

#### 1. Atomic Clashes

No issues found.

#### 2. Peptide Linkage

No issues found.

#### 3. Covalent Geometry

No issues found.

#### 4. Chirality Error

No issues found.

#### 5. Phi/Psi Torsion Angles

No issues found.

## Individual Residue Outliers on Real Space R-value

No issues found.

## Ligand Chemistry

Ligand chemistry has been checked against the Chemical Component Dictionary. The following is a summary.

UNOFFICIAL VALIDATION REPORT

**Identifier:** MG  
**Name:** MAGNESIUM ION  
**Formula:** Mg

| Type                | Program               | Version | Descriptor                  |
|---------------------|-----------------------|---------|-----------------------------|
| SMILES              | ACDLabs               | 10.04   | [Mg+2]                      |
| SMILES<br>CANONICAL | CACTVS                | 3.341   | [Mg++]                      |
| SMILES              | CACTVS                | 3.341   | [Mg++]                      |
| SMILES<br>CANONICAL | OpenEye<br>OEToolkits | 1.5.0   | [Mg+2]                      |
| SMILES              | OpenEye<br>OEToolkits | 1.5.0   | [Mg+2]                      |
| InChI               | InChI                 | 1.03    | InChI=1S/Mg/q+2             |
| InChIKey            | InChI                 | 1.03    | JLVVSXFLKOJNIY-UHFFFAOYSA-N |

## Summary of Structure Factor Validation

| Structure quality                                                           |        |
|-----------------------------------------------------------------------------|--------|
| Average Real space R-factor (Calculated by SFCHECK, V7.02.4)                | 0.0839 |
| Average Real-space correlation coefficient (Calculated by SFCHECK, V7.02.4) | 0.9808 |
| Average Occupancy-weighted avg temperature factor                           | 25.552 |

| Resolution                                        |        |
|---------------------------------------------------|--------|
| High Resolution (Author reported)                 | 2.20   |
| High Resolution (Calculated by SFCHECK, V7.02.4)  | 2.20   |
| High Resolution (Calculated by REFMAC, V5.7.0029) | 2.200  |
| High Resolution (Calculated by PHENIX, V1.8-1069) | 2.20   |
| Low Resolution (Author reported)                  | 45.97  |
| Low Resolution (Calculated by SFCHECK, V7.02.4)   | 24.82  |
| Low Resolution (Calculated by REFMAC, V5.7.0029)  | 24.820 |
| Low Resolution (Calculated by PHENIX, V1.8-1069)  | 24.82  |

| Crystal data                |       |
|-----------------------------|-------|
| Space group                 | H 3   |
| Total number of reflections | 6044  |
| Number of reflections used  | 5753  |
| Completeness of data        | 98.83 |

| R-factors                                       |         |
|-------------------------------------------------|---------|
| R-factor (Author reported)                      | 0.20036 |
| R-factor (Calculated by SFCHECK, V7.02.4)       | 0.227   |
| R-factor (Calculated by REFMAC, V5.7.0029)      | 0.1996  |
| R-factor (Calculated by PHENIX, V1.8-1069)      | 0.1913  |
| Free R-factor (Author reported)                 | 0.22503 |
| Free R-factor (Calculated by SFCHECK, V7.02.4)  | 0.244   |
| Free R-factor (Calculated by REFMAC, V5.7.0029) | 0.2200  |

|                                                 |        |
|-------------------------------------------------|--------|
| Free R-factor (Calculated by PHENIX, V1.8-1069) | 0.2166 |
|-------------------------------------------------|--------|

| <b>Wilson statistics (PHENIX, V1.8-1069)</b> |       |
|----------------------------------------------|-------|
| Wilson B-factor                              | 37.49 |
| Wilson Scale                                 | 1.07  |

| <b>Padilla-Yeates statistics for twin detection (PHENIX, V1.8-1069)</b> |       |
|-------------------------------------------------------------------------|-------|
| Padilla-Yeates $\langle  L  \rangle$                                    | 0.486 |
| Padilla-Yeates $\langle L^*L \rangle$                                   | 0.317 |

UNOFFICIAL VALIDATION REPORT

# wwPDB Validation Report

## Summary of PDB Entry Validation

The results of the validation of this PDB entry are shown below. Some major issues were found.

### Geometry Validation

#### 1. Peptide Linkage

The C-N bonds listed below lie outside of the accepted range for the peptide bond (1.30-1.45). The main chain geometry needs to be corrected.

Residue A ILE 89 and Residue A THR 90 are not properly linked:  
C-N bond distance is 1.15 Å.

### Sequence Validation

The reported biological sequence and the sequence given in the coordinates show no discrepancy.

### Ligand Chemistry

**Identifier:** BEF  
**Name:** BERYLLIUM TRIFLUORIDE ION  
**Formula:** Be F3



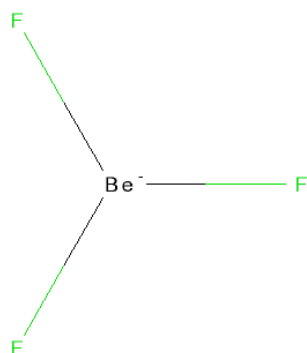

| Type                | Program               | Version | Descriptor                        |
|---------------------|-----------------------|---------|-----------------------------------|
| SMILES              | ACDLabs               | 10.04   | F[Be-](F)F                        |
| SMILES<br>CANONICAL | CACTVS                | 3.341   | F[Be-](F)F                        |
| SMILES              | CACTVS                | 3.341   | F[Be-](F)F                        |
| SMILES<br>CANONICAL | OpenEye<br>OEToolkits | 1.5.0   | [Be-](F)(F)F                      |
| SMILES              | OpenEye<br>OEToolkits | 1.5.0   | [Be-](F)(F)F                      |
| InChI               | InChI                 | 1.03    | InChI=1S/Be.3FH/h;3*1H/q+2;;;/p-3 |
| InChIKey            | InChI                 | 1.03    | OGLAHMCCNXDTIE-UHFFFAOYSA-K       |

**Identifier:** MG2

**Status:** Not found in chemical component dictionary

## Summary of Structure Factor Validation

| Structure quality                                                           |        |
|-----------------------------------------------------------------------------|--------|
| Average Real space R-factor (Calculated by SFCHECK, V7.02.4)                | 0.1085 |
| Average Real-space correlation coefficient (Calculated by SFCHECK, V7.02.4) | 0.9688 |

|                                                   |       |
|---------------------------------------------------|-------|
| Average Occupancy-weighted avg temperature factor | 56.15 |
|---------------------------------------------------|-------|

| Resolution                                       |       |
|--------------------------------------------------|-------|
| High Resolution (Author reported)                | 2.10  |
| High Resolution (Calculated by SFCHECK, V7.02.4) | 2.10  |
| Low Resolution (Author reported)                 | 24.22 |
| Low Resolution (Calculated by SFCHECK, V7.02.4)  | 33.66 |

| Crystal data                |      |
|-----------------------------|------|
| Space group                 | H 3  |
| Total number of reflections | 6882 |
| Number of reflections used  | 6531 |

| R-factors                                      |       |
|------------------------------------------------|-------|
| R-factor (Author reported)                     | 0.231 |
| R-factor (Calculated by SFCHECK, V7.02.4)      | 0.250 |
| Free R-factor (Author reported)                | 0.243 |
| Free R-factor (Calculated by SFCHECK, V7.02.4) | 0.274 |

| Wilson statistics (PHENIX, V1.6-289) |       |
|--------------------------------------|-------|
| Wilson B-factor                      | 46.21 |
| Wilson Scale                         | 0.51  |

| Padilla-Yeates statistics for twin detection (PHENIX, V1.6-289) |       |
|-----------------------------------------------------------------|-------|
| Padilla-Yeates $\langle  L  \rangle$                            | 0.494 |
| Padilla-Yeates $\langle L^*L \rangle$                           | 0.326 |

# wwPDB Validation Report

## Summary of PDB Entry Validation

The results of the validation of this PDB entry are shown below. No major issues were found.

## Sequence Validation

The reported biological sequence and the sequence given in the coordinates show no discrepancy.

## Ligand Chemistry

**Identifier:** MG2

**Status:** Not found in chemical component dictionary

## Summary of Structure Factor Validation

| Structure quality                                                           |        |
|-----------------------------------------------------------------------------|--------|
| Average Real space R-factor (Calculated by SFCHECK, V7.02.4)                | 0.1069 |
| Average Real-space correlation coefficient (Calculated by SFCHECK, V7.02.4) | 0.9695 |
| Average Occupancy-weighted avg temperature factor                           | 43.16  |

| Resolution                                       |       |
|--------------------------------------------------|-------|
| High Resolution (Author reported)                | 2.40  |
| High Resolution (Calculated by SFCHECK, V7.02.4) | 2.20  |
| Low Resolution (Author reported)                 | 23.07 |
| Low Resolution (Calculated by SFCHECK, V7.02.4)  | 23.07 |

| <b>Crystal data</b>         |      |
|-----------------------------|------|
| Space group                 | H 3  |
| Total number of reflections | 4840 |
| Number of reflections used  | 4586 |

| <b>R-factors</b>                               |       |
|------------------------------------------------|-------|
| R-factor (Author reported)                     | 0.225 |
| R-factor (Calculated by SFCHECK, V7.02.4)      | 0.247 |
| Free R-factor (Author reported)                | 0.252 |
| Free R-factor (Calculated by SFCHECK, V7.02.4) | 0.272 |

| <b>Wilson statistics (PHENIX, V1.6-289)</b> |       |
|---------------------------------------------|-------|
| Wilson B-factor                             | 42.05 |
| Wilson Scale                                | 0.28  |

| <b>Padilla-Yeates statistics for twin detection (PHENIX, V1.6-289)</b> |       |
|------------------------------------------------------------------------|-------|
| Padilla-Yeates $\langle  L  \rangle$                                   | 0.484 |
| Padilla-Yeates $\langle L^*L \rangle$                                  | 0.317 |

# wwPDB Validation Report

## Summary of PDB Entry Validation

The results of the validation of this PDB entry are shown below. No major issues were found.

## Sequence Validation

The reported biological sequence and the sequence given in the coordinates show no discrepancy.

## Ligand Chemistry

**Identifier:** CA  
**Name:** CALCIUM ION  
**Formula:** Ca

| Type                | Program               | Version | Descriptor                  |
|---------------------|-----------------------|---------|-----------------------------|
| SMILES              | ACDLabs               | 10.04   | [Ca+2]                      |
| SMILES<br>CANONICAL | CACTVS                | 3.341   | [Ca++]                      |
| SMILES              | CACTVS                | 3.341   | [Ca++]                      |
| SMILES<br>CANONICAL | OpenEye<br>OEToolkits | 1.5.0   | [Ca+2]                      |
| SMILES              | OpenEye<br>OEToolkits | 1.5.0   | [Ca+2]                      |
| InChI               | InChI                 | 1.03    | InChI=1S/Ca/q+2             |
| InChIKey            | InChI                 | 1.03    | BHPQYMZQTOCNFJ-UHFFFAOYSA-N |

**Identifier:** SO4  
**Name:** SULFATE ION  
**Formula:** O4 S

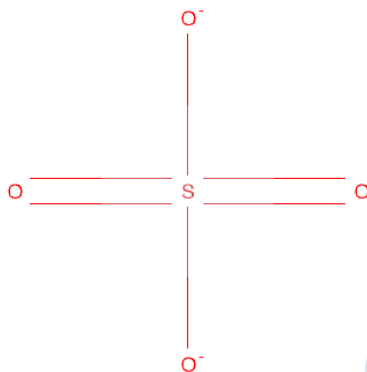

| Type                | Program               | Version | Descriptor                                  |
|---------------------|-----------------------|---------|---------------------------------------------|
| SMILES              | ACDLabs               | 10.04   | [O-]S([O-])(=O)=O                           |
| SMILES<br>CANONICAL | CACTVS                | 3.341   | [O-][S]([O-])(=O)=O                         |
| SMILES              | CACTVS                | 3.341   | [O-][S]([O-])(=O)=O                         |
| SMILES<br>CANONICAL | OpenEye<br>OEToolkits | 1.5.0   | [O-]S(=O)(=O)[O-]                           |
| SMILES              | OpenEye<br>OEToolkits | 1.5.0   | [O-]S(=O)(=O)[O-]                           |
| InChI               | InChI                 | 1.03    | InChI=1S/H2O4S/c1-5(2,3)4/h(H2,1,2,3,4)/p-2 |
| InChIKey            | InChI                 | 1.03    | QAOWNCQODCNURD-UHFFFAOYSA-L                 |

## Summary of Structure Factor Validation

| Structure quality                                                           |        |
|-----------------------------------------------------------------------------|--------|
| Average Real space R-factor (Calculated by SFCHECK, V7.02.4)                | 0.0687 |
| Average Real-space correlation coefficient (Calculated by SFCHECK, V7.02.4) | 0.9881 |
| Average Occupancy-weighted avg temperature factor                           | 20.32  |

| Resolution |  |
|------------|--|
|            |  |

|                                                  |       |
|--------------------------------------------------|-------|
| High Resolution (Author reported)                | 1.66  |
| High Resolution (Calculated by SFCHECK, V7.02.4) | 1.62  |
| Low Resolution (Author reported)                 | 22.24 |
| Low Resolution (Calculated by SFCHECK, V7.02.4)  | 22.24 |

| Crystal data                |       |
|-----------------------------|-------|
| Space group                 | C 2   |
| Total number of reflections | 10882 |
| Number of reflections used  | 10334 |

| R-factors                                      |       |
|------------------------------------------------|-------|
| R-factor (Author reported)                     | 0.218 |
| R-factor (Calculated by SFCHECK, V7.02.4)      | 0.215 |
| Free R-factor (Author reported)                | 0.246 |
| Free R-factor (Calculated by SFCHECK, V7.02.4) | 0.239 |

| Wilson statistics (PHENIX, V1.6-289) |       |
|--------------------------------------|-------|
| Wilson B-factor                      | 15.77 |
| Wilson Scale                         | 0.58  |

| Padilla-Yeates statistics for twin detection (PHENIX, V1.6-289) |       |
|-----------------------------------------------------------------|-------|
| Padilla-Yeates $\langle  L  \rangle$                            | 0.463 |
| Padilla-Yeates $\langle L^*L \rangle$                           | 0.305 |

# wwPDB Validation Report

## Summary of PDB Entry Validation

The results of the validation of this PDB entry are shown below. No major issues were found.

## Sequence Validation

The reported biological sequence and the sequence given in the coordinates show no discrepancy.

## Ligand Chemistry

**Identifier:** SO4  
**Name:** SULFATE ION  
**Formula:** O4 S

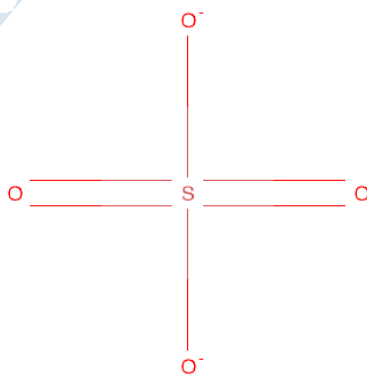

| Type   | Program | Version | Descriptor        |
|--------|---------|---------|-------------------|
| SMILES | ACDLabs | 10.04   | [O-]S([O-])(=O)=O |



|                     |                       |       |                                             |
|---------------------|-----------------------|-------|---------------------------------------------|
| SMILES<br>CANONICAL | CACTVS                | 3.341 | [O-][S]([O-])(=O)=O                         |
| SMILES              | CACTVS                | 3.341 | [O-][S]([O-])(=O)=O                         |
| SMILES<br>CANONICAL | OpenEye<br>OEToolkits | 1.5.0 | [O-]S(=O)(=O)[O-]                           |
| SMILES              | OpenEye<br>OEToolkits | 1.5.0 | [O-]S(=O)(=O)[O-]                           |
| InChI               | InChI                 | 1.03  | InChI=1S/H2O4S/c1-5(2,3)4/h(H2,1,2,3,4)/p-2 |
| InChIKey            | InChI                 | 1.03  | QAOWNCQODCNURD-UHFFFAOYSA-L                 |

## Summary of Structure Factor Validation

| Structure quality                                                           |        |
|-----------------------------------------------------------------------------|--------|
| Average Real space R-factor (Calculated by SFCHECK, V7.02.4)                | 0.0886 |
| Average Real space R-factor (Calculated by MAPMAN, V7.8.5)                  | 0.1004 |
| Average Real-space correlation coefficient (Calculated by SFCHECK, V7.02.4) | 0.9789 |
| Average Real-space correlation coefficient (Calculated by MAPMAN, V7.8.5)   | 0.9167 |
| Average Occupancy-weighted avg temperature factor                           | 38.43  |

| Resolution                                        |        |
|---------------------------------------------------|--------|
| High Resolution (Author reported)                 | 1.90   |
| High Resolution (Calculated by SFCHECK, V7.02.4)  | 1.87   |
| High Resolution (Calculated by REFMAC, V5.5.0109) | 1.867  |
| Low Resolution (Author reported)                  | 18.37  |
| Low Resolution (Calculated by SFCHECK, V7.02.4)   | 18.36  |
| Low Resolution (Calculated by REFMAC, V5.5.0109)  | 18.364 |

| Crystal data                |          |
|-----------------------------|----------|
| Space group                 | P 32 2 1 |
| Total number of reflections | 10649    |
| Number of reflections used  | 10121    |

| <b>R-factors</b>                                |        |
|-------------------------------------------------|--------|
| R-factor (Author reported)                      | 0.227  |
| R-factor (Calculated by SFCHECK, V7.02.4)       | 0.239  |
| R-factor (Calculated by REFMAC, V5.5.0109)      | 0.2281 |
| Free R-factor (Author reported)                 | 0.256  |
| Free R-factor (Calculated by SFCHECK, V7.02.4)  | 0.271  |
| Free R-factor (Calculated by REFMAC, V5.5.0109) | 0.2620 |

| <b>Wilson statistics (PHENIX, V1.6-289)</b> |       |
|---------------------------------------------|-------|
| Wilson B-factor                             | 34.61 |
| Wilson Scale                                | 0.41  |

| <b>Padilla-Yeates statistics for twin detection (PHENIX, V1.6-289)</b> |       |
|------------------------------------------------------------------------|-------|
| Padilla-Yeates $\langle  L  \rangle$                                   | 0.505 |
| Padilla-Yeates $\langle L^*L \rangle$                                  | 0.337 |
